# Supplementary material for: ACLY ubiquitination by CUL3-KLHL25 induces the reprogramming of fatty acid metabolism to facilitate iTreg differentiation
Source: eLife journal article supplement (doi:10.7554/elife.62394), 2021-09-06
Supplement: data1 [file Figure 1-figure supplement C-Source data-3.xlsx]

## Sheet: Sheet1
Figure 1-figure supplement C-Source data-3.
		Ctrl	TGFβ1	TGFβ1+ACLYOE
	Rep 1	0.951	0.552	0.775
	Rep 2	1.06	0.603	0.883
	Rep 3	1.189	0.711	0.975
	Average	1.06667	0.622	0.877667
	SD	0.1191	0.08119	0.1001
		Ctrl vs TGFβ1	TGFβ1 vs TGFβ1 +ACLYOE
	p value	0.0017	0.0214
