# Supplementary material for: ACLY ubiquitination by CUL3-KLHL25 induces the reprogramming of fatty acid metabolism to facilitate iTreg differentiation
Source: eLife journal article supplement (doi:10.7554/elife.62394), 2021-09-06
Supplement: data1 [file Figure 1-figure supplement D-Source data-3.xlsx]

## Sheet: Sheet1
Figure 1-figure supplement D-Source data-3.
		Ctrl	TGFβ1	TGFβ1 +siAcly#1	TGFβ1 +siAcly#2
	Rep 1	0.833333	0.6052	0.333333	0.35
	Rep 2	1.22	0.783333	0.491667	0.491667
	Rep 3	0.946667	0.766667	0.416667	0.511
	Average	1	0.7184	0.413889	0.450889
	SD	0.1988	0.09839	0.0792	0.08791
		Ctrl vs TGFβ1	TGFβ1 vs TGFβ1 +siAcly#1	TGFβ1 vs TGFβ1 +siAcly#2
	p value	0.0253	0.0179	0.0313
