# Supplementary material for: ACLY ubiquitination by CUL3-KLHL25 induces the reprogramming of fatty acid metabolism to facilitate iTreg differentiation
Source: eLife journal article supplement (doi:10.7554/elife.62394), 2021-09-06
Supplement: data1 [file Figure 1-figure supplement E-Source data.xlsx]

## Sheet: Sheet1
Figure 1-figure supplement E-Source data.
		Ctrl	TGFβ1	TGFβ1 vs SB204990
	Rep 1	0.884956	0.542478	0.321239
	Rep 2	1.06195	0.707965	0.509735
	Rep 3	1.06195	0.730973	0.465487
	Average	1.00295	0.660472	0.432154
	SD	0.1022	0.1028	0.09857
		Ctrl vs TGFβ1	TGFβ1 vs TGFβ1 +SB204990
	p value	0.0061	0.0327
