# Supplementary material for: ACLY ubiquitination by CUL3-KLHL25 induces the reprogramming of fatty acid metabolism to facilitate iTreg differentiation
Source: eLife journal article supplement (doi:10.7554/elife.62394), 2021-09-06
Supplement: data1 [file Figure 1A-Source data.xlsx]

## Sheet: Sheet1
Figure 1A-Source data.
		ACLY		ACC		FASN
		Th0	iTreg	Th0	iTreg	Th0	iTreg
	Rep 1	0.948119	0.583538	0.992647	1.19118	1.10526	0.684211
	Rep 2	0.941841	0.577028	0.882353	0.705882	1.21053	0.894737
	Rep 3	1.11005	0.596209	1.125	0.727941	0.684211	1
	Average	1	0.585592	1	0.875	1	0.859649
	SD	0.095356	0.00975402	0.121491	0.274039	0.2785	0.160792
	p value		0.0017		0.5101		0.4918
