# Supplementary material for: ACLY ubiquitination by CUL3-KLHL25 induces the reprogramming of fatty acid metabolism to facilitate iTreg differentiation
Source: eLife journal article supplement (doi:10.7554/elife.62394), 2021-09-06
Supplement: data1 [file Figure 1B-Source data.xlsx]

## Sheet: Sheet1
Figure 1B-Source data.
		Acetyl-CoA		OAA
		Th0	iTreg	Th0	iTreg
	Rep 1	1.1934	0.749955	1.05844	0.816401
	Rep 2	0.910186	0.68264	1.07153	0.662018
	Rep 3	0.796413	0.546112	0.870043	0.524642
	Average	0.966667	0.659569	1	0.667687
	SD	0.149841	0.103861	0.11274	0.145962
	p value		0.0453		0.0355
