# Supplementary material for: ACLY ubiquitination by CUL3-KLHL25 induces the reprogramming of fatty acid metabolism to facilitate iTreg differentiation
Source: eLife journal article supplement (doi:10.7554/elife.62394), 2021-09-06
Supplement: data1 [file Figure 1C-Source data.xlsx]

## Sheet: Sheet1
Figure 1C-Source data.
		Ctrl	TGFβ1	TGFβ1+ACLYOE
	Rep 1	3.5	33.6	18.9
	Rep 2	5.41	32.6	21
	Rep 3	2.42	29.8	16.1
	Average	3.77667	32	18.6667
	SD	1.514	3.743	2.458
	p value			0.0002
