# Supplementary material for: ACLY ubiquitination by CUL3-KLHL25 induces the reprogramming of fatty acid metabolism to facilitate iTreg differentiation
Source: eLife journal article supplement (doi:10.7554/elife.62394), 2021-09-06
Supplement: data1 [file Figure 1D-Source data.xlsx]

## Sheet: Sheet1
Figure 1D-Source data.
		siCtrl	siAcly#1	siAcly#2
	Rep 1	27.9	42.2	36
	Rep 2	26.6	43.9	41.1
	Rep 3	24.9	41.2	41.3
	Average	26.4667	42.4333	39.4667
	SD	1.504	1.365	3.004
		siCtrl vs siAcly#1	siCtrl vs siAcly#2
	p value	< 0.0001	0.0003
