# Supplementary material for: ACLY ubiquitination by CUL3-KLHL25 induces the reprogramming of fatty acid metabolism to facilitate iTreg differentiation
Source: eLife journal article supplement (doi:10.7554/elife.62394), 2021-09-06
Supplement: data1 [file Figure 1E-Source data.xlsx]

## Sheet: Sheet1
Figure 1E-Source data.
		Ctrl	TGFβ1	TGFβ1+SB204990
	Rep 1	2.3	31.1	42.2
	Rep 2	2.71	27.9	44.9
	Rep 3	2.5	23.1	49
	Average	2.50333	27.3667	45.3667
	SD	0.205	4.027	3.424
		TGFβ1 vs TGFβ1 +SB204990
	p value	0.0004
