# Supplementary material for: ACLY ubiquitination by CUL3-KLHL25 induces the reprogramming of fatty acid metabolism to facilitate iTreg differentiation
Source: eLife journal article supplement (doi:10.7554/elife.62394), 2021-09-06
Supplement: data1 [file Figure 2-figure supplement 1A-Source data.xlsx]

## Sheet: Sheet1
Figure 2-figure supplement 1A-Source data.
		Ctrl	SB204990
	Rep 1	0.897262	0.864463
	Rep 2	0.924504	0.966641
	Rep 3	1.01433	1.01325
	Rep 4	1.1639	1.23443
	Average	1	1.0197
	SD	0.1202	0.1561
	p value		0.8481
