# Supplementary material for: ACLY ubiquitination by CUL3-KLHL25 induces the reprogramming of fatty acid metabolism to facilitate iTreg differentiation
Source: eLife journal article supplement (doi:10.7554/elife.62394), 2021-09-06
Supplement: data1 [file Figure 2-figure supplement 1B-Source data.xlsx]

## Sheet: Sheet1
Figure 2-figure supplement 1B-Source data.
		Ctrl	SB204990
	Rep 1	0.953612	1.09804
	Rep 2	1.30567	1.21815
	Rep 3	1.00477	0.729849
	Rep 4	0.735927	0.533821
	Average	0.999995	0.894964
	SD	0.2348	0.318
	p value		0.6142
