# Supplementary material for: ACLY ubiquitination by CUL3-KLHL25 induces the reprogramming of fatty acid metabolism to facilitate iTreg differentiation
Source: eLife journal article supplement (doi:10.7554/elife.62394), 2021-09-06
Supplement: data1 [file Figure 2-figure supplement 1C-Source data.xlsx]

## Sheet: Sheet1
Figure 2-figure supplement 1C-Source data.
		Ctrl	SB204990
	Rep 1	0.844019	0.859598
	Rep 2	1.07484	0.891754
	Rep 3	1.18963	0.872934
	Rep 4	0.891505	0.919797
	Average	1	0.886021
	SD	0.1609	0.0261
	p value		0.2115
