# Supplementary material for: ACLY ubiquitination by CUL3-KLHL25 induces the reprogramming of fatty acid metabolism to facilitate iTreg differentiation
Source: eLife journal article supplement (doi:10.7554/elife.62394), 2021-09-06
Supplement: data1 [file Figure 2-figure supplement 1D-Source data.xlsx]

## Sheet: Sheet1
Figure 2-figure supplement 1D-Source data.
		Ctrl	SB204990
	Rep 1	347	426
	Rep 2	330	405
	Rep 3	409	364
	Rep 4	391	354
	Average	369.25	387.25
	SD	36.92	33.97
	p value		0.5
