# Supplementary material for: ACLY ubiquitination by CUL3-KLHL25 induces the reprogramming of fatty acid metabolism to facilitate iTreg differentiation
Source: eLife journal article supplement (doi:10.7554/elife.62394), 2021-09-06
Supplement: data1 [file Figure 2-figure supplement 2A-Source data.xlsx]

## Sheet: Sheet1
Figure 2-figure supplement 2A-Source data.
	Mevalonate (μM)	0	10	20	40	80	160
	Rep 1	1.12685	1.38949	1.68702	2.12846	2.42943	2.65944
	Rep 2	0.814462	1.13332	1.91802	2.20268	1.98164	2.34705
	Rep 3	1.05869	1.22601	1.28718	2.00366	2.17675	2.34134
	Average	1	1.24961	1.63074	2.1116	2.19594	2.44928
	SD	0.1643	0.1297	0.3192	0.1006	0.2245	0.182
		0 vs 10	0 vs 20	0 vs 40	0 vs 80	0 vs 160
	p value	0.1518	0.0022	< 0.0001	< 0.0001	< 0.0001
