# Supplementary material for: ACLY ubiquitination by CUL3-KLHL25 induces the reprogramming of fatty acid metabolism to facilitate iTreg differentiation
Source: eLife journal article supplement (doi:10.7554/elife.62394), 2021-09-06
Supplement: data1 [file Figure 2-figure supplement 2B-Source data.xlsx]

## Sheet: Sheet1
Figure 2-figure supplement 2B-Source data.
	Cholesterol (μM)	0	1	5	10	20	40
	Rep 1	358	487	552	543	511	520
	Rep 2	387	555	597	567	527	532
	Rep 3	363	502	544	540	534	545
	Average	369.333	514.667	564.333	550	524	532.333
	SD	15.5	35.73	28.57	14.8	11.79	12.5
		0 vs 1	0 vs 5	0 vs 10	0 vs 20	0 vs 40
	p value	< 0.0001	< 0.0001	< 0.0001	< 0.0001	< 0.0001
