# Supplementary material for: ACLY ubiquitination by CUL3-KLHL25 induces the reprogramming of fatty acid metabolism to facilitate iTreg differentiation
Source: eLife journal article supplement (doi:10.7554/elife.62394), 2021-09-06
Supplement: data1 [file Figure 2-figure supplement 2C-Source data-1.xlsx]

## Sheet: Sheet1
Figure 2-figure supplement 2C-Source data-1.
		Ctrl	SB204990	SB204990 +Mevlonate 10	SB204990 +Mevlonate 20	SB204990 +Mevlonate 40
	Rep 1	25.3	35.3	33	33.4	34.6
	Rep 2	21	29	28.1	27.6	27
	Rep 3	27.2	38.7	35.7	37.8	37.1
	Rep 4	21.8	35.8	32.6	31.9	35.2
	Average	23.825	34.7	32.35	32.675	33.475
	SD	2.924	4.085	3.15	4.209	4.446
		Ctrl vs SB204990	SB204990 vs SB204990 +Mevlonate 10	SB204990 vs SB204990 +Mevlonate 20	SB204990 vs SB204990 +Mevlonate 40
	p value	0.0011	0.397	0.4641	0.656
