# Supplementary material for: ACLY ubiquitination by CUL3-KLHL25 induces the reprogramming of fatty acid metabolism to facilitate iTreg differentiation
Source: eLife journal article supplement (doi:10.7554/elife.62394), 2021-09-06
Supplement: data1 [file Figure 2-figure supplement 2C-Source data-2.xlsx]

## Sheet: Sheet1
Figure 2-figure supplement 2C-Source data-2.
		Ctrl	SB204990	SB204990 +Cholesterol 10	SB204990 +Cholesterol 20	SB204990 +Cholesterol 40
	Rep 1	25.3	35.3	34	29.5	30.1
	Rep 2	21	29	31.5	29	31.7
	Rep 3	27.2	38.7	30.6	35.2	29.5
	Rep 4	21.8	35.8	33.6	32.2	33.9
	Average	23.825	34.7	32.425	31.475	31.3
	SD	2.924	4.085	1.638	2.854	1.966
		Ctrl vs SB204990	SB204990 vs SB204990 +Cholesterol 10	SB204990 vs SB204990 +Cholesterol 20	SB204990 vs SB204990 +Cholesterol 40
	p value	< 0.0001	0.2728	0.1274	0.1095
