# Supplementary material for: ACLY ubiquitination by CUL3-KLHL25 induces the reprogramming of fatty acid metabolism to facilitate iTreg differentiation
Source: eLife journal article supplement (doi:10.7554/elife.62394), 2021-09-06
Supplement: data1 [file Figure 2-figure supplement 3B-Source data.xlsx]

## Sheet: Sheet1
Figure 2-figure supplement 3B-Source data.
		Ctrl	SB204990
	Rep 1	0.789473	0.947368
	Rep 2	1.02632	1.18421
	Rep 3	1.18421	1.42105
	Average	1	1.18421
	SD	0.1987	0.2368
	p value		0.3603
