# Supplementary material for: ACLY ubiquitination by CUL3-KLHL25 induces the reprogramming of fatty acid metabolism to facilitate iTreg differentiation
Source: eLife journal article supplement (doi:10.7554/elife.62394), 2021-09-06
Supplement: data1 [file Figure 2-figure supplement 3C-Source data-3.xlsx]

## Sheet: Sheet1
Figure 2-figure supplement 3C-Source data 3.
		Ctrl	SB204990
	Rep 1	0.815782	0.959694
	Rep 2	1.00357	1.24563
	Rep 3	1.18065	1.24236
	Average	1	1.14923
	SD	0.1825	0.1642
	p value		0.3517
