# Supplementary material for: ACLY ubiquitination by CUL3-KLHL25 induces the reprogramming of fatty acid metabolism to facilitate iTreg differentiation
Source: eLife journal article supplement (doi:10.7554/elife.62394), 2021-09-06
Supplement: data1 [file Figure 2-figure supplement 3D-Source data-5.xlsx]

## Sheet: Sheet1
Figure 2-figure supplement 3D-Source data-5.
		H3Ac		H4Ac
		Ctrl	SB204990	Ctrl	SB204990
	Rep 1	1.28173	1.14505	1.24119	0.925995
	Rep 2	0.995967	1.09633	1.10834	1.20455
	Rep 3	0.722304	0.721354	0.650478	0.728374
	Average	1	0.987577	1	0.952973
	SD	0.279734	0.231839	0.309898	0.239232
	p value		0.9556		0.8453
