# Supplementary material for: ACLY ubiquitination by CUL3-KLHL25 induces the reprogramming of fatty acid metabolism to facilitate iTreg differentiation
Source: eLife journal article supplement (doi:10.7554/elife.62394), 2021-09-06
Supplement: data1 [file Figure 2-figure supplement 4A-Source data.xlsx]

## Sheet: Sheet1
Figure 2-figure supplement 4A-Source data.
	Bodipy- Palmitate (μM)	0	25	50	100	200	400
	Rep 1	557	36199	64907	86240	106683	119188
	Rep 2	627	40000	60000	80000	100000	120000
	Rep 3	700	52001	76533	92333	117445	140820
	Average	628	42733.3	67146.7	86191	108043	126669
	SD	71.51	8248	8491	6167	8802	12262
		0 vs 25	0 vs 50	0 vs 100	0 vs 200	0 vs 400
	p value	< 0.0001	< 0.0001	< 0.0001	< 0.0001	< 0.0001
