# Supplementary material for: ACLY ubiquitination by CUL3-KLHL25 induces the reprogramming of fatty acid metabolism to facilitate iTreg differentiation
Source: eLife journal article supplement (doi:10.7554/elife.62394), 2021-09-06
Supplement: data1 [file Figure 2-figure supplement 4C-Source data.xlsx]

## Sheet: Sheet1
Figure 2-figure supplement 4C-Source data.
		Ctrl	SB204990	SB204990 +PF05175157 (2.5 μM)	SB204990 +PF05175157 (5 μM)	SB204990+PF05175157 (10 μM)	SB204990 +Cerulenin (1 μM)	SB204990 +Cerulenin (2 μM)	SB204990+Cerulenin (4 μM)
	Rep 1	23.4	31.1	34	35.6	35	27.2	21.8	14.8
	Rep 2	25.2	34.8	34.4	34.3	33.2	28	24.7	16.9
	Rep 3	22	32.1	31.2	33.7	34.6	30.7	24.9	17.1
	Average	23.5333	32.6667	33.2	34.5333	34.2667	28.6333	23.8	16.2667
	SD	1.604	1.914	1.744	0.9713	0.9452	1.834	1.735	1.274
		Ctrl vs SB204990	SB204990 vs SB204990 +PF05175157 (2.5 μM)	SB204990 vs SB204990 +PF05175157 (5 μM)	SB204990 vs SB204990 +PF05175157 (10 μM)	SB204990 vs SB204990 +Cerulenin (1 μM)	SB204990 vs SB204990 +Cerulenin (2 μM)	SB204990 vs SB204990 +Cerulenin (4 μM)	Ctrl vs SB204990 +Cerulenin (2 μM)	Ctrl vs SB204990 +Cerulenin (4 μM)
	p value	< 0.0001	0.6782	0.1585	0.223	0.0056	< 0.0001	< 0.0001	0.8353	< 0.0001
