# Supplementary material for: ACLY ubiquitination by CUL3-KLHL25 induces the reprogramming of fatty acid metabolism to facilitate iTreg differentiation
Source: eLife journal article supplement (doi:10.7554/elife.62394), 2021-09-06
Supplement: data1 [file Figure 2-figure supplement 4D-Source data.xlsx]

## Sheet: Sheet1
Figure 2-figure supplement 4D-Source data.
		Ctrl	SB204990
	Rep 1	1.14747	0.775858
	Rep 2	0.974283	0.491275
	Rep 3	0.878247	0.429485
	Average	1	0.565539
	SD	0.1364	0.1847
	p value		0.0306
