# Supplementary material for: ACLY ubiquitination by CUL3-KLHL25 induces the reprogramming of fatty acid metabolism to facilitate iTreg differentiation
Source: eLife journal article supplement (doi:10.7554/elife.62394), 2021-09-06
Supplement: data1 [file Figure 2-figure supplement 5A-Source data.xlsx]

## Sheet: Sheet1
Figure 2-figure supplement 5A-Source data.
		Ctrl	SB204990	SB204990 +Malonyl-CoA	SB204990 +Cerulenin
	Rep 1	0.900316	0.422117	1.01311	0.911216
	Rep 2	0.821959	0.612006	0.987678	0.881043
	Rep 3	1.27772	0.4406	0.911848	0.858294
	Average	1	0.491574	0.970879	0.883518
	SD	0.2437	0.1047	0.05268	0.02655
		Ctrl vs SB204990	SB204990 vs SB204990 +Malonyl-CoA	SB204990 vs SB204990 +Cerulenin
	p value	0.0018	0.0025	0.0077
