# Supplementary material for: ACLY ubiquitination by CUL3-KLHL25 induces the reprogramming of fatty acid metabolism to facilitate iTreg differentiation
Source: eLife journal article supplement (doi:10.7554/elife.62394), 2021-09-06
Supplement: data1 [file Figure 2-figure supplement 5B-Source data.xlsx]

## Sheet: Sheet1
Figure 2-figure supplement 5B-Source data.
		Ctrl	SB204990	SB204990 +Etomoxir
	Rep 1	20.6	31.5	22
	Rep 2	18.6	30	21.2
	Rep 3	22	29	24.3
	Average	20.4	30.1667	22.5
	SD	1.709	1.258	1.609
		Ctrl vs SB204990	Ctrl vs SB204990 +Etomoxir	SB204990 vs SB204990 +Etomoxir
	p value	0.0002	0.1454	0.0009
