# Supplementary material for: ACLY ubiquitination by CUL3-KLHL25 induces the reprogramming of fatty acid metabolism to facilitate iTreg differentiation
Source: eLife journal article supplement (doi:10.7554/elife.62394), 2021-09-06
Supplement: data1 [file Figure 2A-Source data.xlsx]

## Sheet: Isotope corrected data 
Chain length and number of double bonds	Name	Ion-pair	RT(min)	Ctrl- Experiment 1	Ctrl- Experiment 2	Ctrl- Experiment 3	Ctrl- Experiment 4	SB204990- Experiment 1	SB204990- Experiment 2	SB204990- Experiment 3	SB204990- Experiment 4
C12	LauriAcid-m0	285.3 -> 226.3	7.93938	0.999088	0.998965	0.999288	0.998962	0.999218	0.999446	0.999097	0.999419
C12	LauriAcid-m1	286.3 -> 227.3	7.93892	0	0	0	0	0	0	0	0
C12	LauriAcid-m2	287.3 -> 228.3	7.93843	0	0	0	0	0	0	0	0
C12	LauriAcid-m3	288.3 -> 229.3	7.934	0	0	0	0	0	0	0	0
C12	LauriAcid-m4	289.3 -> 230.3	7.93748	0.000188202	0.000308176	7.18134e-05	0.00036319	0.000346456	0.000283257	0.000340523	0.000186531
C12	LauriAcid-m5	290.3 -> 231.3	7.94	0	0	0	0	0	0	0	0
C12	LauriAcid-m6	291.3 -> 232.3	7.93652	0.000399121	0.000489481	0.000413879	0.000318473	0.000336739	0.000111387	0.000446717	0.000267217
C12	LauriAcid-m7	292.3 -> 233.3	7.94	0	0	0	0	0	0	0	0
C12	LauriAcid-m8	293.3 -> 234.3	7.94	0.000324333	0.000237394	0.000226207	0.000356674	9.87087e-05	0.000159158	0.000115943	0.000127584
C12	LauriAcid-m9	294.3 -> 235.3	7.94	0	0	0	0	0	0	0	0
C12	LauriAcid-m10	295.3 -> 236.3	7.9413	0	0	0	0	0	0	0	0
C12	LauriAcid-m11	296.3 -> 237.3	7.94	0	0	0	0	0	0	0	0
C12	LauriAcid-m12	297.3 -> 238.3	7.94	0	0	0	0	0	0	0	0
SUM of 13C-labelled C12				0.000911655	0.00103505	0.000711899	0.00103834	0.000781904	0.000553802	0.000903184	0.000581332
C14:1	MyristoleiAcid-m0	311.3 -> 252.2	8.79915	1	1	1	1	1	1	1	1
C14:1	MyristoleiAcid-m1	312.3 -> 253.2	8.7987	0	0	0	0	0	0	0	0
C14:1	MyristoleiAcid-m2	313.3 -> 254.2	8.79	0	0	0	0	0	0	0	0
C14:1	MyristoleiAcid-m3	314.3 -> 255.2	8.79	0	0	0	0	0	0	0	0
C14:1	MyristoleiAcid-m4	315.3 -> 256.2	8.79	0	0	0	0	0	0	0	0
C14:1	MyristoleiAcid-m5	316.3 -> 257.2	8.79	0	0	0	0	0	0	0	0
C14:1	MyristoleiAcid-m6	317.3 -> 258.2	8.79	0	0	0	0	0	0	0	0
C14:1	MyristoleiAcid-m7	318.3 -> 259.2	8.79	0	0	0	0	0	0	0	0
C14:1	MyristoleiAcid-m8	319.3 -> 260.2	8.79	0	0	0	0	0	0	0	0
C14:1	MyristoleiAcid-m9	320.3 -> 261.2	8.79	0	0	0	0	0	0	0	0
C14:1	MyristoleiAcid-m10	321.3 -> 262.2	8.79	0	0	0	0	0	0	0	0
C14:1	MyristoleiAcid-m11	322.3 -> 263.2	8.79	0	0	0	0	0	0	0	0
C14:1	MyristoleiAcid-m12	323.3 -> 264.2	8.79	0	0	0	0	0	0	0	0
C14:1	MyristoleiAcid-m13	324.3 -> 265.2	8.79	0	0	0	0	0	0	0	0
C14:1	MyristoleiAcid-m14	325.3 -> 266.2	8.79	0	0	0	0	0	0	0	0
SUM of 13C-labelled C14:1
C14:0	MyristicAcid-m0	313.3 -> 254.2	9.73722	0.903447	0.903462	0.903691	0.90362	0.940366	0.93931	0.940221	0.941456
C14:0	MyristicAcid-m1	314.3 -> 255.2	9.7368	0	0	0	0	0	0	0	0
C14:0	MyristicAcid-m2	315.3 -> 256.2	9.73638	0.00664315	0.00689889	0.00629476	0.00635195	0.00360569	0.00365969	0.00383639	0.0035952
C14:0	MyristicAcid-m3	316.3 -> 257.2	9.72925	0.000923005	0.000942039	0.00109726	0.000976044	0.000783064	0.000871558	0.00073907	0.000689998
C14:0	MyristicAcid-m4	317.3 -> 258.2	9.74223	0.0139516	0.0138106	0.014185	0.0141299	0.00931819	0.00942856	0.00948259	0.00933611
C14:0	MyristicAcid-m5	318.3 -> 259.2	9.72842	0.00224596	0.00229545	0.00231988	0.00227029	0.00149443	0.00161619	0.00116766	0.00150713
C14:0	MyristicAcid-m6	319.3 -> 260.2	9.728	0.0216016	0.02195	0.0214786	0.0221529	0.0136689	0.014078	0.0139977	0.01421
C14:0	MyristicAcid-m7	320.3 -> 261.2	9.73428	0.00337381	0.0030724	0.0031828	0.0034147	0.00243956	0.00237274	0.00219769	0.00018104
C14:0	MyristicAcid-m8	321.3 -> 262.2	9.73387	0.0251747	0.0244272	0.0248378	0.0241773	0.0148523	0.0150735	0.0150859	0.0155051
C14:0	MyristicAcid-m9	322.3 -> 263.2	9.74015	0.00300427	0.00303065	0.00307457	0.00323075	0.0020044	0.00196306	0.00200058	0.00197147
C14:0	MyristicAcid-m10	323.3 -> 264.2	9.73302	0.0182529	0.0186336	0.0183614	0.0181852	0.0105939	0.0106614	0.0103866	0.0105501
C14:0	MyristicAcid-m11	324.3 -> 265.2	9.7393	0.00138171	0.00147665	0.00147632	0.00149112	0.000873219	0.000965729	0.000885179	0.000997874
C14:0	MyristicAcid-m12	325.3 -> 266.2	9.74	0	0	0	0	0	0	0	0
C14:0	MyristicAcid-m13	326.3 -> 267.2	9.74	0	0	0	0	0	0	0	0
C14:0	MyristicAcid-m14	327.3 -> 268.2	9.74	0	0	0	0	0	0	0	0
SUM of 13C-labelled C14:0				0.0965526	0.0965375	0.0963085	0.0963801	0.0596336	0.0606904	0.0597794	0.058544
C16:0	PlamiticAcid-m0	341.3 -> 282.3	11.8468	0.95078	0.951304	0.950557	0.950924	0.976037	0.976666	0.976295	0.976642
C16:0	PlamiticAcid-m1	342.3 -> 283.3	11.8362	0	0	0	0	0	0	0	0
C16:0	PlamiticAcid-m2	343.3 -> 284.3	11.8359	0	0	0	0	0	0	0	0
C16:0	PlamiticAcid-m3	344.3 -> 285.3	11.8355	0.000384411	0.000252288	0.000352826	0.000295515	0.000142351	9.58695e-05	0.000128803	0.00010106
C16:0	PlamiticAcid-m4	345.3 -> 286.3	11.8352	0.00389457	0.00384466	0.0038877	0.00387223	0.00215918	0.00213878	0.00214296	0.00210297
C16:0	PlamiticAcid-m5	346.3 -> 287.3	11.8349	0.000765562	0.000802883	0.00083011	0.000826386	0.000437768	7.08956e-05	0.000419118	0.000383794
C16:0	PlamiticAcid-m6	347.3 -> 288.3	11.8278	0.00777685	0.00755148	0.00772975	0.0076149	0.0038467	0.00387052	0.00384473	0.00387738
C16:0	PlamiticAcid-m7	348.3 -> 289.3	11.8409	0.00147621	0.00146852	0.00150661	0.00139395	0.000779254	0.000710547	0.000773702	0.000737186
C16:0	PlamiticAcid-m8	349.3 -> 290.3	11.8473	0.0106845	0.0107461	0.0109765	0.0105805	0.00508994	0.00510014	0.00520019	0.00489881
C16:0	PlamiticAcid-m9	350.3 -> 291.3	11.8402	0.00192762	0.00178999	0.00182714	0.00182146	0.000752496	0.000840253	0.000884314	0.000893768
C16:0	PlamiticAcid-m10	351.3 -> 292.3	11.8332	0.0104725	0.0103431	0.0103798	0.0103237	0.00473779	0.00470715	0.00470301	0.00460477
C16:0	PlamiticAcid-m11	352.3 -> 293.3	11.8396	0.00146331	0.00128624	0.00137766	0.00138824	0.000616257	0.000624974	0.000668085	0.000649136
C16:0	PlamiticAcid-m12	353.3 -> 294.3	11.847	0.00692866	0.00728364	0.00698538	0.00753912	0.00394732	0.00382838	0.00360678	0.00368991
C16:0	PlamiticAcid-m13	354.3 -> 295.3	11.847	0.000484213	0.000559234	0.000694962	0.000635256	0.000348215	0.000288061	0.000354269	0.000353742
C16:0	PlamiticAcid-m14	355.3 -> 296.3	11.847	0.00244648	0.00230261	0.00239017	0.00227089	0.000916468	0.000870703	0.000808661	0.000895696
C16:0	PlamiticAcid-m15	356.3 -> 297.3	11.847	8.03536e-05	6.7594e-05	8.3964e-05	7.77459e-05	3.16037e-05	3.236e-05	2.86256e-05	1.84733e-05
C16:0	PlamiticAcid-m16	357.3 -> 298.3	11.8513	0.000434474	0.000397406	0.000420646	0.000435669	0.000157353	0.000155393	0.000142093	0.000150943
SUM of 13C-labelled C16:0				0.0492197	0.0486958	0.0494433	0.0490756	0.0239627	0.023334	0.0237053	0.0233576
C16:1	PalmitoleicAcid-m0	339.3 -> 280.3	10.4367	0.995785	0.996016	0.995484	0.993626	0.996723	0.996318	0.898002	0.998177
C16:1	PalmitoleicAcid-m1	340.3 -> 281.3	10.443	0	0	0	0	0	0	0	0
C16:1	PalmitoleicAcid-m2	341.3 -> 282.3	10.4426	0.00150878	0.000535091	0.000758748	0.0035447	0.00207911	0.00242749	0.001346	0.000356309
C16:1	PalmitoleicAcid-m3	342.3 -> 283.3	10.43	0.000250962	0.000493293	0.000891554	0	0	0	0	0.000292107
C16:1	PalmitoleicAcid-m4	343.3 -> 284.3	10.433	0.00245515	0.00295542	0.00286598	0.00282971	0.00119793	0.00125464	0.0015723	0.00117449
C16:1	PalmitoleicAcid-m5	344.3 -> 285.3	10.433	0	0	0	0	0	0	0	0
C16:1	PalmitoleicAcid-m6	345.3 -> 286.3	10.433	0	0	0	0	0	0	0	0
C16:1	PalmitoleicAcid-m7	346.3 -> 287.3	10.433	0	0	0	0	0	0	0	0
C16:1	PalmitoleicAcid-m8	347.3 -> 288.3	10.4337	0	0	0	0	0	0	0	0
C16:1	PalmitoleicAcid-m9	348.3 -> 289.3	10.433	0	0	0	0	0	0	0	0
C16:1	PalmitoleicAcid-m10	349.3 -> 290.3	10.433	0	0	0	0	0	0	0	0
C16:1	PalmitoleicAcid-m11	350.3 -> 291.3	10.433	0	0	0	0	0	0	0	0
C16:1	PalmitoleicAcid-m12	351.3 -> 292.3	10.433	0	0	0	0	0	0	0	0
C16:1	PalmitoleicAcid-m13	352.3 -> 293.3	10.433	0	0	0	0	0	0	0	0
C16:1	PalmitoleicAcid-m14	353.3 -> 294.3	10.433	0	0	0	0	0	0	0	0
C16:1	PalmitoleicAcid-m15	354.3 -> 295.3	10.433	0	0	0	0	0	0	0	0
C16:1	PalmitoleicAcid-m16	355.3 -> 296.3	10.433	0	0	0	0	0	0	0	0
SUM of 13C-labelled C16:1				0.00421489	0.0039838	0.00451628	0.0063744	0.00327704	0.00368214	0.0029183	0.00182291
C18:0	StearicAcid-m0	369.4 -> 310.3	13.713	0.959433	0.959212	0.960568	0.959699	0.971079	0.970804	0.970772	0.97032
C18:0	StearicAcid-m1	370.4 -> 311.3	13.7125	0	0	0	0	0	0	0	0
C18:0	StearicAcid-m2	371.4 -> 312.3	13.7123	0.0249561	0.0257416	0.0256213	0.0259265	0.0227316	0.0233509	0.0235575	0.0236546
C18:0	StearicAcid-m3	372.4 -> 313.3	13.7189	0.000332271	1.58839e-05	2.17318e-06	0.000171441	0.000356428	0	0.000156612	0
C18:0	StearicAcid-m4	373.4 -> 314.3	13.7052	0.000840136	0.0008899	0.000883936	0.000871837	0.00042506	0.000484353	0.000424767	0.000413269
C18:0	StearicAcid-m5	374.4 -> 315.3	13.7118	0.000189951	0.000194154	0.000170036	0.000171946	8.39842e-05	3.75523e-05	0	7.22691e-05
C18:0	StearicAcid-m6	375.4 -> 316.3	13.713	0.00166753	0.00162749	0.00170056	0.00167227	0.00070737	0.000732647	0.000756353	0.000723209
C18:0	StearicAcid-m7	376.4 -> 317.3	13.713	0.000348229	0.000374286	0.000348444	6.72737e-05	0.000189239	0.000166589	0	0.000172719
C18:0	StearicAcid-m8	377.4 -> 318.3	13.7181	0.00269173	0.0026749	0.00263736	0.00279554	0.00101502	0.0010836	0.00112544	0.00108366
C18:0	StearicAcid-m9	378.4 -> 319.3	13.713	0.000551891	0.000549983	0	0.000497964	0.000239995	0.000224088	0	0.000226032
C18:0	StearicAcid-m10	379.4 -> 320.3	13.713	0.0032808	0.00315014	0.00328377	0.00316221	0.00124632	0.00125601	0.00128468	0.00122834
C18:0	StearicAcid-m11	380.4 -> 321.3	13.713	0.000504338	0.000533592	0	0.000495766	0.00019988	0.000189446	0	0.00021033
C18:0	StearicAcid-m12	381.4 -> 322.3	13.713	0.00305244	0.00272066	0.00297939	0.00235836	0.00116756	0.00106957	0.00119128	0.00115207
C18:0	StearicAcid-m13	382.4 -> 323.3	13.713	0.000223947	0.000424321	0.000287467	0.000401646	7.06962e-05	0.00019987	0.000102675	0.00017162
C18:0	StearicAcid-m14	383.4 -> 324.3	13.713	0.00135373	0.00136085	0.00102123	0.00116098	0.000343465	0.000217076	0.000483019	0.000404569
C18:0	StearicAcid-m15	384.4 -> 325.3	13.713	0.000132042	9.51937e-05	8.49513e-05	0.000100521	2.2521e-05	4.43762e-05	2.04688e-06	1.04199e-05
C18:0	StearicAcid-m16	385.4 -> 326.3	13.713	0.000441731	0.00043508	0.000411531	0.000447109	0.000122157	0.000139642	0.000143245	0.000157173
C18:0	StearicAcid-m17	386.4 -> 327.3	13.713	0	0	0	0	0	0	0	0
C18:0	StearicAcid-m18	387.4 -> 328.3	13.713	0	0	0	0	0	0	0	0
SUM of 13C-labelled C18:0				0.0405669	0.0407881	0.0394321	0.0403014	0.0289213	0.0291957	0.0292276	0.0296803
C18:1	OleicAcid-m0	367.4 -> 308.3	12.6143	0.984916	0.985028	0.9842	0.985052	0.992394	0.991916	0.990649	0.991203
C18:1	OleicAcid-m1	368.4 -> 309.3	12.6095	0	0	0	0	0	0	0	0
C18:1	OleicAcid-m2	369.4 -> 310.3	12.6025	0.00558344	0.00560611	0.00674622	0.00545403	0.00362456	0.00343605	0.00445912	0.00400821
C18:1	OleicAcid-m3	370.4 -> 311.3	12.5955	0.00151498	0.00134017	0.00105597	0.00137148	0.00132437	0.00139546	0.00136576	0.00127869
C18:1	OleicAcid-m4	371.4 -> 312.3	12.6019	0.000308504	0.000299443	0.000345837	0.000276235	0.000107347	0.00012354	0.000113452	0.000126664
C18:1	OleicAcid-m5	372.4 -> 313.3	12.6083	8.64207e-05	8.11714e-05	8.1389e-05	9.89651e-05	4.80709e-05	4.93767e-05	3.97912e-05	4.1027e-05
C18:1	OleicAcid-m6	373.4 -> 314.3	12.6013	0.000713913	0.000720588	0.000721561	0.000694637	0.000304551	0.000294678	0.000316009	0.00031427
C18:1	OleicAcid-m7	374.4 -> 315.3	12.5943	0.000187047	0.000190649	0.000187679	0.000191515	7.55232e-05	8.44181e-05	8.25663e-05	8.45888e-05
C18:1	OleicAcid-m8	375.4 -> 316.3	12.6074	0.0013088	0.00124162	0.00128818	0.00127626	0.000501612	0.000518397	0.000502486	0.000502446
C18:1	OleicAcid-m9	376.4 -> 317.3	12.6205	0.000225143	0.000277869	0.000287293	0.000298077	0.000118348	0.000117645	0.000114277	0.00012324
C18:1	OleicAcid-m10	377.4 -> 318.3	12.6	0.00159372	0.00159764	0.00155066	0.00160069	0.000567614	0.000581604	0.000584553	0.000586097
C18:1	OleicAcid-m11	378.4 -> 319.3	12.6132	0.000303753	0.000278121	0.000264001	0.000271727	2.22389e-05	3.04899e-05	0.000102169	0.000108325
C18:1	OleicAcid-m12	379.4 -> 320.3	12.6	0.00199991	0.00199156	0.0020032	0.00203634	0.000416958	0.000897143	0.00108132	0.00108134
C18:1	OleicAcid-m13	380.4 -> 321.3	12.6	0.000102771	0.000272239	0.000158253	0.000259312	0.000101925	0.000156207	0.000138622	0.000119464
C18:1	OleicAcid-m14	381.4 -> 322.3	12.6	0.000782254	0.000725786	0.000788948	0.000782107	0.000244877	0.000259525	0.000280334	0.000243118
C18:1	OleicAcid-m15	382.4 -> 323.3	12.6	5.63043e-05	7.3377e-05	3.01008e-05	7.31443e-05	1.89137e-05	2.89823e-05	5.25308e-05	4.67222e-05
C18:1	OleicAcid-m16	383.4 -> 324.3	12.6	0.000260389	0.000220147	0.000228995	0.000239089	7.45519e-05	4.87624e-05	6.39584e-05	8.17076e-05
C18:1	OleicAcid-m17	384.4 -> 325.3	12.6	0	6.3811e-06	8.59029e-06	1.24962e-05	8.13417e-06	1.42579e-05	7.23575e-06	1.96082e-06
C18:1	OleicAcid-m18	385.4 -> 326.3	12.6	5.68389e-05	4.86738e-05	5.34859e-05	1.13945e-05	4.6302e-05	4.72843e-05	4.71498e-05	4.89343e-05
SUM of 13C-labelled C18:1				0.0150842	0.0149716	0.0158004	0.0149475	0.0076059	0.00808383	0.00935134	0.0087968
C18:2	LinoleicAcidm0	365.4 -> 306.3	11.3027	1	1	1	1	1	1	1	1
C18:2	LinoleicAcidm1	366.4 -> 307.3	11.3069	0	0	0	0	0	0	0	0
C18:2	LinoleicAcidm2	367.4 -> 308.3	11.2954	0	0	0	0	0	0	0	0
C18:2	LinoleicAcidm3	368.4 -> 309.3	11.32	0	0	0	0	0	0	0	0
C18:2	LinoleicAcidm4	369.4 -> 310.3	11.3	0	0	0	0	0	0	0	0
C18:2	LinoleicAcidm5	370.4 -> 311.3	11.3	0	0	0	0	0	0	0	0
C18:2	LinoleicAcidm6	371.4 -> 312.3	11.3	0	0	0	0	0	0	0	0
C18:2	LinoleicAcidm7	372.4 -> 313.3	11.3	0	0	0	0	0	0	0	0
C18:2	LinoleicAcidm8	373.4 -> 314.3	11.3	0	0	0	0	0	0	0	0
C18:2	LinoleicAcidm9	374.4 -> 315.3	11.3	0	0	0	0	0	0	0	0
C18:2	LinoleicAcidm10	375.4 -> 316.3	11.3	0	0	0	0	0	0	0	0
C18:2	LinoleicAcidm11	376.4 -> 317.3	11.3	0	0	0	0	0	0	0	0
C18:2	LinoleicAcidm12	377.4 -> 318.3	11.3	0	0	0	0	0	0	0	0
C18:2	LinoleicAcidm13	378.4 -> 319.3	11.3	0	0	0	0	0	0	0	0
C18:2	LinoleicAcidm14	379.4 -> 320.3	11.3	0	0	0	0	0	0	0	0
C18:2	LinoleicAcidm15	380.4 -> 321.3	11.3	0	0	0	0	0	0	0	0
C18:2	LinoleicAcidm16	381.4 -> 322.3	11.3	0	0	0	0	0	0	0	0
C18:2	LinoleicAcidm17	382.4 -> 323.3	11.3	0	0	0	0	0	0	0	0
C18:2	LinoleicAcidm18	383.4 -> 324.3	11.3	0	0	0	0	0	0	0	0
SUM of 13C-labelled C18:2				0	0	0	0	0	0	0	0
C20:1	11-EicosenoicAcid-m0	395.4 -> 336.4	14.0878	0.719616	0.720471	0.723049	0.725013	0.760132	0.756652	0.757893	0.754785
C20:1	11-EicosenoicAcid-m1	396.4 -> 337.4	14.0877	0.00378108	0.00359652	0.000603717	0	0.00503365	0.00465296	0.00426793	0.00796554
C20:1	11-EicosenoicAcid-m2	397.4 -> 338.4	14.088	0.265845	0.266253	0.266459	0.263052	0.227439	0.2322	0.230031	0.229749
C20:1	11-EicosenoicAcid-m3	398.4 -> 339.4	14.088	0	0	0	0	0	0	0	0
C20:1	11-EicosenoicAcid-m4	399.4 -> 340.4	14.088	0.00986394	0.00874625	0.0091235	0.0110778	0.00701264	0.00597145	0.00735595	0.00703377
C20:1	11-EicosenoicAcid-m5	400.4 -> 341.4	14.088	1.31446e-05	4.88057e-05	6.26759e-05	0	0.000119767	0.000249754	0	0.000125578
C20:1	11-EicosenoicAcid-m6	401.4 -> 342.4	14.088	0.000880452	0.000884297	0.000702531	0.000857531	0.000263002	0.000273122	0.000452418	0.000341514
C20:1	11-EicosenoicAcid-m7	402.4 -> 343.4	14.088	0	0	0	0	0	0	0	0
C20:1	11-EicosenoicAcid-m8	403.4 -> 344.4	14.088	0	0	0	0	0	0	0	0
C20:1	11-EicosenoicAcid-m9	404.4 -> 345.4	14.088	0	0	0	0	0	0	0	0
C20:1	11-EicosenoicAcid-m10	405.4 -> 346.4	14.088	0	0	0	0	0	0	0	0
C20:1	11-EicosenoicAcid-m11	406.4 -> 347.4	14.088	0	0	0	0	0	0	0	0
C20:1	11-EicosenoicAcid-m12	407.4 -> 348.4	14.088	0	0	0	0	0	0	0	0
C20:1	11-EicosenoicAcid-m13	408.4 -> 349.4	14.088	0	0	0	0	0	0	0	0
C20:1	11-EicosenoicAcid-m14	409.4 -> 350.4	14.088	0	0	0	0	0	0	0	0
C20:1	11-EicosenoicAcid-m15	410.4 -> 351.4	14.088	0	0	0	0	0	0	0	0
C20:1	11-EicosenoicAcid-m16	411.4 -> 352.4	14.088	0	0	0	0	0	0	0	0
C20:1	11-EicosenoicAcid-m17	412.4 -> 353.4	14.088	0	0	0	0	0	0	0	0
C20:1	11-EicosenoicAcid-m18	413.4 -> 354.4	14.088	0	0	0	0	0	0	0	0
C20:1	11-EicosenoicAcid-m19	414.4 -> 355.4	14.088	0	0	0	0	0	0	0	0
C20:1	11-EicosenoicAcid-m20	415.4 -> 356.4	14.088	0	0	0	0	0	0	0	0
SUM of 13C-labelled C20:1				0.280384	0.279529	0.276951	0.274987	0.239868	0.243348	0.242107	0.245215
C20:0	ArachidicAcid-m0	397.4 -> 338.3	15.0356	0.893783	0.896859	0.88653	0.882769	0.900914	0.907378	0.906317	0.909262
C20:0	ArachidicAcid-m1	398.4 -> 339.3	15.0355	0	0	0	0	0.00296647	0	0	0
C20:0	ArachidicAcid-m2	399.4 -> 340.3	15.0215	0.0945296	0.0924662	0.103217	0.106827	0.0850402	0.0837724	0.0851196	0.0831347
C20:0	ArachidicAcid-m3	400.4 -> 341.3	15.0214	0.00289893	3.45446e-05	0	5.27268e-05	0	0.000251933	0	5.73408e-05
C20:0	ArachidicAcid-m4	401.4 -> 342.3	15.0488	0.00878884	0.0106405	0.0102529	0.0103512	0.0110796	0.00859742	0.00856334	0.00754605
C20:0	ArachidicAcid-m5	402.4 -> 343.3	15.04	0	0	0	0	0	0	0	0
C20:0	ArachidicAcid-m6	403.4 -> 344.3	15.04	0	0	0	0	0	0	0	0
C20:0	ArachidicAcid-m7	404.4 -> 345.3	15	0	0	0	0	0	0	0	0
C20:0	ArachidicAcid-m8	405.4 -> 346.3	15.04	0	0	0	0	0	0	0	0
C20:0	ArachidicAcid-m9	406.4 -> 347.3	15.04	0	0	0	0	0	0	0	0
C20:0	ArachidicAcid-m10	407.4 -> 348.3	15.04	0	0	0	0	0	0	0	0
C20:0	ArachidicAcid-m11	408.4 -> 349.3	15.04	0	0	0	0	0	0	0	0
C20:0	ArachidicAcid-m12	409.4 -> 350.3	15.04	0	0	0	0	0	0	0	0
C20:0	ArachidicAcid-m13	410.4 -> 351.3	15.04	0	0	0	0	0	0	0	0
C20:0	ArachidicAcid-m14	411.4 -> 352.3	15.04	0	0	0	0	0	0	0	0
C20:0	ArachidicAcid-m15	412.4 -> 353.3	15.04	0	0	0	0	0	0	0	0
C20:0	ArachidicAcid-m16	413.4 -> 354.3	15.04	0	0	0	0	0	0	0	0
C20:0	ArachidicAcid-m17	414.4 -> 355.3	15.04	0	0	0	0	0	0	0	0
C20:0	ArachidicAcid-m18	415.4 -> 356.3	15.04	0	0	0	0	0	0	0	0
C20:0	ArachidicAcid-m19	416.4 -> 357.3	15.04	0	0	0	0	0	0	0	0
C20:0	ArachidicAcid-m20	417.4 -> 358.3	15.04	0	0	0	0	0	0	0	0
SUM of 13C-labelled C20:0				0.106217	0.103141	0.11347	0.117231	0.0990862	0.0926217	0.093683	0.090738
C21:0	Heneicosanoic acid-m0	411.4 -> 352.3	15.55	1	1	1	1	1	1	1	1
C21:0	Heneicosanoic acid-m1	412.4 -> 353.3	15.55	0	0	0	0	0	0	0	0
C21:0	Heneicosanoic acid-m2	413.4 -> 354.3	15.55	0	0	0	0	0	0	0	0
C21:0	Heneicosanoic acid-m3	414.4 -> 355.3	15.55	0	0	0	0	0	0	0	0
C21:0	Heneicosanoic acid-m4	415.4 -> 356.3	15.55	0	0	0	0	0	0	0	0
C21:0	Heneicosanoic acid-m5	416.4 -> 357.3	15.55	0	0	0	0	0	0	0	0
C21:0	Heneicosanoic acid-m6	417.4 -> 358.3	15.55	0	0	0	0	0	0	0	0
C21:0	Heneicosanoic acid-m7	418.4 -> 359.3	15.55	0	0	0	0	0	0	0	0
C21:0	Heneicosanoic acid-m8	419.4 -> 360.3	15.55	0	0	0	0	0	0	0	0
C21:0	Heneicosanoic acid-m9	420.4 -> 361.3	15.55	0	0	0	0	0	0	0	0
C21:0	Heneicosanoic acid-m10	421.4 -> 362.3	15.5529	0	0	0	0	0	0	0	0
C21:0	Heneicosanoic acid-m11	422.4 -> 363.3	15.55	0	0	0	0	0	0	0	0
C21:0	Heneicosanoic acid-m12	423.4 -> 364.3	15.55	0	0	0	0	0	0	0	0
C21:0	Heneicosanoic acid-m13	424.4 -> 365.3	15.55	0	0	0	0	0	0	0	0
C21:0	Heneicosanoic acid-m14	425.4 -> 366.3	15.55	0	0	0	0	0	0	0	0
C21:0	Heneicosanoic acid-m15	426.4 -> 367.3	15.55	0	0	0	0	0	0	0	0
C21:0	Heneicosanoic acid-m16	427.4 -> 368.3	15.55	0	0	0	0	0	0	0	0
C21:0	Heneicosanoic acid-m17	428.4 -> 369.3	15.55	0	0	0	0	0	0	0	0
C21:0	Heneicosanoic acid-m18	429.4 -> 370.3	15.55	0	0	0	0	0	0	0	0
C21:0	Heneicosanoic acid-m19	430.4 -> 371.3	15.55	0	0	0	0	0	0	0	0
C21:0	Heneicosanoic acid-m20	431.4 -> 372.3	15.55	0	0	0	0	0	0	0	0
C21:0	Heneicosanoic acid-m21	432.4 -> 373.3	15.55	0	0	0	0	0	0	0	0
SUM of 13C-labelled C21:0				0	0	0	0	0	0	0	0
C22:1	ErucicAcid-m0	423.4 -> 364.4	15.2299	0.942699	0.860775	0.899055	0.870778	0.923129	0.912454	0.894855	0.913327
C22:1	ErucicAcid-m1	424.4 -> 365.4	15.2365	0	0.0389991	0	0	0	0	0	0
C22:1	ErucicAcid-m2	425.4 -> 366.4	15.23	0.0188428	0.0895922	0.0646655	0.0919068	0.0549736	0.0574255	0.0746013	0.0554182
C22:1	ErucicAcid-m3	426.4 -> 367.4	15.23	0.00232935	0	0.00571982	0	0.000684186	0.00165202	0	0.00170609
C22:1	ErucicAcid-m4	427.4 -> 368.4	15.23	0.0361291	0.0106339	0.0305592	0.0373148	0.0212127	0.0284688	0.0305435	0.0295491
C22:1	ErucicAcid-m5	428.4 -> 369.4	15.23	0	0	0	0	0	0	0	0
C22:1	ErucicAcid-m6	429.4 -> 370.4	15.23	0	0	0	0	0	0	0	0
C22:1	ErucicAcid-m7	430.4 -> 371.4	15.23	0	0	0	0	0	0	0	0
C22:1	ErucicAcid-m8	431.4 -> 372.4	15.23	0	0	0	0	0	0	0	0
C22:1	ErucicAcid-m9	432.4 -> 373.4	15.23	0	0	0	0	0	0	0	0
C22:1	ErucicAcid-m10	433.4 -> 374.4	15.23	0	0	0	0	0	0	0	0
C22:1	ErucicAcid-m11	434.4 -> 375.4	15.23	0	0	0	0	0	0	0	0
C22:1	ErucicAcid-m12	435.4 -> 376.4	15.23	0	0	0	0	0	0	0	0
C22:1	ErucicAcid-m13	436.4 -> 377.4	15.23	0	0	0	0	0	0	0	0
C22:1	ErucicAcid-m14	437.4 -> 378.4	15.23	0	0	0	0	0	0	0	0
C22:1	ErucicAcid-m15	438.4 -> 379.4	15.23	0	0	0	0	0	0	0	0
C22:1	ErucicAcid-m16	439.4 -> 380.4	15.23	0	0	0	0	0	0	0	0
C22:1	ErucicAcid-m17	440.4 -> 381.4	15.23	0	0	0	0	0	0	0	0
C22:1	ErucicAcid-m18	441.4 -> 382.4	15.23	0	0	0	0	0	0	0	0
C22:1	ErucicAcid-m19	442.4 -> 383.4	15.23	0	0	0	0	0	0	0	0
C22:1	ErucicAcid-m20	443.4 -> 384.4	15.23	0	0	0	0	0	0	0	0
C22:1	ErucicAcid-m21	444.4 -> 385.4	15.23	0	0	0	0	0	0	0	0
C22:1	ErucicAcid-m22	445.4 -> 386.4	15.23	0	0	0	0	0	0	0	0
SUM of 13C-labelled C22:1				0.0573013	0.139225	0.100945	0.129222	0.0768705	0.0875463	0.105145	0.0866735
C22:0	BehenicAcid-m0	425.4 -> 366.4	16	1	1	1	1	1	1	1	1
C22:0	BehenicAcid-m1	426.4 -> 367.4	16.0049	0	0	0	0	0	0	0	0
C22:0	BehenicAcid-m2	427.4 -> 368.4	16.0116	0	0	0	0	0	0	0	0
C22:0	BehenicAcid-m3	428.4 -> 369.4	16	0	0	0	0	0	0	0	0
C22:0	BehenicAcid-m4	429.4 -> 370.4	16	0	0	0	0	0	0	0	0
C22:0	BehenicAcid-m5	430.4 -> 371.4	16	0	0	0	0	0	0	0	0
C22:0	BehenicAcid-m6	431.4 -> 372.4	16	0	0	0	0	0	0	0	0
C22:0	BehenicAcid-m7	432.4 -> 373.4	16	0	0	0	0	0	0	0	0
C22:0	BehenicAcid-m8	433.4 -> 374.4	16	0	0	0	0	0	0	0	0
C22:0	BehenicAcid-m9	434.4 -> 375.4	16	0	0	0	0	0	0	0	0
C22:0	BehenicAcid-m10	435.4 -> 376.4	16	0	0	0	0	0	0	0	0
C22:0	BehenicAcid-m11	436.4 -> 377.4	16	0	0	0	0	0	0	0	0
C22:0	BehenicAcid-m12	437.4 -> 378.4	16	0	0	0	0	0	0	0	0
C22:0	BehenicAcid-m13	438.4 -> 379.4	16	0	0	0	0	0	0	0	0
C22:0	BehenicAcid-m14	439.4 -> 380.4	16	0	0	0	0	0	0	0	0
C22:0	BehenicAcid-m15	440.4 -> 381.4	16	0	0	0	0	0	0	0	0
C22:0	BehenicAcid-m16	441.4 -> 382.4	16	0	0	0	0	0	0	0	0
C22:0	BehenicAcid-m17	442.4 -> 383.4	16	0	0	0	0	0	0	0	0
C22:0	BehenicAcid-m18	443.4 -> 384.4	16	0	0	0	0	0	0	0	0
C22:0	BehenicAcid-m19	444.4 -> 385.4	16	0	0	0	0	0	0	0	0
C22:0	BehenicAcid-m20	445.4 -> 386.4	16	0	0	0	0	0	0	0	0
C22:0	BehenicAcid-m21	446.4 -> 387.4	16	0	0	0	0	0	0	0	0
C22:0	BehenicAcid-m22	447.4 -> 388.4	16.0025	0	0	0	0	0	0	0	0
SUM of 13C-labelled C22:0				0	0	0	0	0	0	0	0
C23:0	TricosanoicAcid-m0	439.4 -> 380.4	16.47	1	1	1	1	1	1	1	1
C23:0	TricosanoicAcid-m1	440.4 -> 381.4	16.47	0	0	0	0	0	0	0	0
C23:0	TricosanoicAcid-m2	441.4 -> 382.4	16.47	0	0	0	0	0	0	0	0
C23:0	TricosanoicAcid-m3	442.4 -> 383.4	16.47	0	0	0	0	0	0	0	0
C23:0	TricosanoicAcid-m4	443.4 -> 384.4	16.47	0	0	0	0	0	0	0	0
C23:0	TricosanoicAcid-m5	444.4 -> 385.4	16.47	0	0	0	0	0	0	0	0
C23:0	TricosanoicAcid-m6	445.4 -> 386.4	16.47	0	0	0	0	0	0	0	0
C23:0	TricosanoicAcid-m7	446.4 -> 387.4	16.47	0	0	0	0	0	0	0	0
C23:0	TricosanoicAcid-m8	447.4 -> 388.4	16.47	0	0	0	0	0	0	0	0
C23:0	TricosanoicAcid-m9	448.4 -> 389.4	16.47	0	0	0	0	0	0	0	0
C23:0	TricosanoicAcid-m10	449.4 -> 390.4	16.47	0	0	0	0	0	0	0	0
C23:0	TricosanoicAcid-m11	450.4 -> 391.4	16.47	0	0	0	0	0	0	0	0
C23:0	TricosanoicAcid-m12	451.4 -> 392.4	16.47	0	0	0	0	0	0	0	0
C23:0	TricosanoicAcid-m13	452.4 -> 393.4	16.47	0	0	0	0	0	0	0	0
C23:0	TricosanoicAcid-m14	453.4 -> 394.4	16.47	0	0	0	0	0	0	0	0
C23:0	TricosanoicAcid-m15	454.4 -> 395.4	16.47	0	0	0	0	0	0	0	0
C23:0	TricosanoicAcid-m16	455.4 -> 396.4	16.47	0	0	0	0	0	0	0	0
C23:0	TricosanoicAcid-m17	456.4 -> 397.4	16.47	0	0	0	0	0	0	0	0
C23:0	TricosanoicAcid-m18	457.4 -> 398.4	16.47	0	0	0	0	0	0	0	0
C23:0	TricosanoicAcid-m19	458.4 -> 399.4	16.47	0	0	0	0	0	0	0	0
C23:0	TricosanoicAcid-m20	459.4 -> 400.4	16.47	0	0	0	0	0	0	0	0
C23:0	TricosanoicAcid-m21	460.4 -> 401.4	16.47	0	0	0	0	0	0	0	0
C23:0	TricosanoicAcid-m22	461.4 -> 402.4	16.47	0	0	0	0	0	0	0	0
C23:0	TricosanoicAcid-m23	462.4 -> 403.4	16.47	0	0	0	0	0	0	0	0
SUM of 13C-labelled C23:0				0	0	0	0	0	0	0	0
C24:0	LignocericAcid-m0	453.5 -> 394.4	16.7898	0.86327	0.878713	0.8638	0.861493	0.976168	0.982384	0.9691	0.977859
C24:0	LignocericAcid-m1	454.5 -> 395.4	16.7827	0	0	0	0.0210704	0	0	0	0
C24:0	LignocericAcid-m2	455.5 -> 396.4	16.7825	0.13673	0.121287	0.1362	0.117437	0.0238319	0.0176163	0.0308998	0.0221411
C24:0	LignocericAcid-m3	456.5 -> 397.4	16.78	0	0	0	0	0	0	0	0
C24:0	LignocericAcid-m4	457.5 -> 398.4	16.78	0	0	0	0	0	0	0	0
C24:0	LignocericAcid-m5	458.5 -> 399.4	16.78	0	0	0	0	0	0	0	0
C24:0	LignocericAcid-m6	459.5 -> 400.4	16.78	0	0	0	0	0	0	0	0
C24:0	LignocericAcid-m7	460.5 -> 401.4	16.78	0	0	0	0	0	0	0	0
C24:0	LignocericAcid-m8	461.5 -> 402.4	16.78	0	0	0	0	0	0	0	0
C24:0	LignocericAcid-m9	462.5 -> 403.4	16.78	0	0	0	0	0	0	0	0
C24:0	LignocericAcid-m10	463.5 -> 404.4	16.78	0	0	0	0	0	0	0	0
C24:0	LignocericAcid-m11	464.5 -> 405.4	16.78	0	0	0	0	0	0	0	0
C24:0	LignocericAcid-m12	465.5 -> 406.4	16.78	0	0	0	0	0	0	0	0
C24:0	LignocericAcid-m13	466.5 -> 407.4	16.78	0	0	0	0	0	0	0	0
C24:0	LignocericAcid-m14	467.5 -> 408.4	16.78	0	0	0	0	0	0	0	0
C24:0	LignocericAcid-m15	468.5 -> 409.4	16.78	0	0	0	0	0	0	0	0
C24:0	LignocericAcid-m16	469.5 -> 410.4	16.78	0	0	0	0	0	0	0	0
C24:0	LignocericAcid-m17	470.5 -> 411.4	16.78	0	0	0	0	0	0	0	0
C24:0	LignocericAcid-m18	471.5 -> 412.4	16.78	0	0	0	0	0	0	0	0
C24:0	LignocericAcid-m19	472.5 -> 413.4	16.78	0	0	0	0	0	0	0	0
C24:0	LignocericAcid-m20	473.5 -> 414.4	16.78	0	0	0	0	0	0	0	0
C24:0	LignocericAcid-m21	474.5 -> 415.4	16.78	0	0	0	0	0	0	0	0
C24:0	LignocericAcid-m22	475.5 -> 416.4	16.78	0	0	0	0	0	0	0	0
C24:0	LignocericAcid-m23	476.5 -> 417.4	16.78	0	0	0	0	0	0	0	0
C24:0	LignocericAcid-m24	477.5 -> 418.4	16.78	0	0	0	0	0	0	0	0
SUM of 13C-labelled C24:0				0.13673	0.121287	0.1362	0.138507	0.0238319	0.0176163	0.0308998	0.0221411
C24:1	NervonicAcid-m0	451.5 -> 392.4	16.1123	1	1	1	1	1	1	1	1
C24:1	NervonicAcid-m1	452.5 -> 393.4	16.0917	0	0	0	0	0	0	0	0
C24:1	NervonicAcid-m2	453.5 -> 394.4	16.1	0	0	0	0	0	0	0	0
C24:1	NervonicAcid-m3	454.5 -> 395.4	16.1	0	0	0	0	0	0	0	0
C24:1	NervonicAcid-m4	455.5 -> 396.4	16.1	0	0	0	0	0	0	0	0
C24:1	NervonicAcid-m5	456.5 -> 397.4	16.1	0	0	0	0	0	0	0	0
C24:1	NervonicAcid-m6	457.5 -> 398.4	16.1	0	0	0	0	0	0	0	0
C24:1	NervonicAcid-m7	458.5 -> 399.4	16.1	0	0	0	0	0	0	0	0
C24:1	NervonicAcid-m8	459.5 -> 400.4	16.1	0	0	0	0	0	0	0	0
C24:1	NervonicAcid-m9	460.5 -> 401.4	16.1	0	0	0	0	0	0	0	0
C24:1	NervonicAcid-m10	461.5 -> 402.4	16.1	0	0	0	0	0	0	0	0
C24:1	NervonicAcid-m11	462.5 -> 403.4	16.1	0	0	0	0	0	0	0	0
C24:1	NervonicAcid-m12	463.5 -> 404.4	16.1	0	0	0	0	0	0	0	0
C24:1	NervonicAcid-m13	464.5 -> 405.4	16.1	0	0	0	0	0	0	0	0
C24:1	NervonicAcid-m14	465.5 -> 406.4	16.1	0	0	0	0	0	0	0	0
C24:1	NervonicAcid-m15	466.5 -> 407.4	16.1	0	0	0	0	0	0	0	0
C24:1	NervonicAcid-m16	467.5 -> 408.4	16.1	0	0	0	0	0	0	0	0
C24:1	NervonicAcid-m17	468.5 -> 409.4	16.1	0	0	0	0	0	0	0	0
C24:1	NervonicAcid-m18	469.5 -> 410.4	16.1	0	0	0	0	0	0	0	0
C24:1	NervonicAcid-m19	470.5 -> 411.4	16.1	0	0	0	0	0	0	0	0
C24:1	NervonicAcid-m20	471.5 -> 412.4	16.1	0	0	0	0	0	0	0	0
C24:1	NervonicAcid-m21	472.5 -> 413.4	16.1	0	0	0	0	0	0	0	0
C24:1	NervonicAcid-m22	473.5 -> 414.4	16.1	0	0	0	0	0	0	0	0
C24:1	NervonicAcid-m23	474.5 -> 415.4	16.1	0	0	0	0	0	0	0	0
C24:1	NervonicAcid-m24	475.5 -> 416.4	16.1	0	0	0	0	0	0	0	0
SUM of 13C-labelled C24:1				0	0	0	0	0	0	0	0

## Sheet: Statistics
Figure 2A-Source data.
		Lauri acid (C12:0)		Myristic acid (C14:0)		Plamitic acid (C16:0)		Palmitoleic acid (C16:1, cis-9)		Stearic acid (C18:0)		Oleic acid (C18:1, cis-9)		Eicosenoic acid (C20:1, cis-11)		Arachidic acid (C20:0)		Erucic acid (C22:1, cis-13)		Lignoceric acid (C24:0)
		Ctrl	SB204990	Ctrl	SB204990	Ctrl	SB204990	Ctrl	SB204990	Ctrl	SB204990	Ctrl	SB204990	Ctrl	SB204990	Ctrl	SB204990	Ctrl	SB204990	Ctrl	SB204990
	Rep 1	0.0009117	0.0007819	0.0965526	0.0596336	0.0492197	0.0239627	0.0042149	0.003277	0.0405669	0.0289213	0.0151	0.00761	0.280384	0.239869	0.106217	0.0990862	0.0573013	0.0768705	0.13673	0.0238319
	Rep 2	0.0010351	0.0005538	0.0965375	0.0606904	0.0486958	0.023334	0.0039838	0.0036821	0.0407881	0.0291957	0.015	0.00808	0.279529	0.243348	0.103141	0.0926217	0.139225	0.0875463	0.121287	0.0176163
	Rep 3	0.0007119	0.0009032	0.0963085	0.0597794	0.0494433	0.0237053	0.0045163	0.002918	0.0394321	0.0292276	0.0158	0.00935	0.276951	0.242107	0.11347	0.093683	0.100945	0.105145	0.1362	0.0308998
	Rep 4	0.0010383	0.0005813	0.0963801	0.058544	0.0490756	0.0233576	0.0063744	0.0018229	0.0403014	0.0296803	0.0149	0.0088	0.274987	0.245215	0.117231	0.090738	0.129222	0.0866735	0.138507	0.0221411
	Average	0.00092425	0.00070505	0.0964447	0.0596619	0.0491086	0.0235899	0.00477235	0.002925	0.0402721	0.0292562	0.0152	0.00846	0.277963	0.242635	0.110015	0.0940322	0.106673	0.0890588	0.133181	0.0236223
	SD	0.0001533	0.0001667	0.0001197	0.0008798	0.000314	0.000301	0.00109	0.0007983	0.0005943	0.0003144	0.0004082	0.0007691	0.002463	0.002243	0.006472	0.003583	0.03669	0.01177	0.007991	0.005516
	p value		0.1011		< 0.0001		< 0.0001		0.034		< 0.0001		< 0.0001		< 0.0001		0.005		0.3958		< 0.0001
