# Supplementary material for: ACLY ubiquitination by CUL3-KLHL25 induces the reprogramming of fatty acid metabolism to facilitate iTreg differentiation
Source: eLife journal article supplement (doi:10.7554/elife.62394), 2021-09-06
Supplement: data1 [file Figure 2B-Source data.xlsx]

## Sheet: Sheet1
Figure 2B-Source data.
		Ctrl	SB204990	SB204990 +Palmitate 25	SB204990 +Palmitate 50	SB204990 +Palmitate 100
	Rep 1	25.3	35.3	34.6	33	34.3
	Rep 2	21	29	28.6	27.5	30.6
	Rep 3	27.2	33.7	30.8	30.6	32.7
	Rep 4	21.8	30.8	30.3	29.3	32.9
	Average	23.825	32.2	31.075	30.1	32.625
	SD	2.924	2.832	2.532	2.314	1.526
		Ctrl vs SB204990	SB204990 vs SB204990+Palmitate 25	SB204990 vs SB204990+Palmitate 50	SB204990 vs SB204990+Palmitate 100
	p value	0.0002	0.5303	0.249	0.8115
