# Supplementary material for: ACLY ubiquitination by CUL3-KLHL25 induces the reprogramming of fatty acid metabolism to facilitate iTreg differentiation
Source: eLife journal article supplement (doi:10.7554/elife.62394), 2021-09-06
Supplement: data1 [file Figure 2C-Source data.xlsx]

## Sheet: Sheet1
Figure 2C-Source data.
		Ctrl	SB204990	SB204990 +Malonyl-CoA 25	SB204990 +Malonyl-CoA 50	SB204990 +Malonyl-CoA 100
	Rep 1	28.3	35.3	26.2	26.6	18
	Rep 2	21	29	24.6	25.6	15.6
	Rep 3	27.2	38.7	27.2	22.6	17.8
	Rep 4	22.4	34.3	26.4	22.2	18.3
	Average	24.725	34.325	26.1	24.25	17.425
	SD	3.568	4.019	1.089	2.181	1.234
		Ctrl vs SB204990	SB204990 vs SB204990+Malonyl-CoA 25	SB204990 vs SB204990+Malonyl-CoA 50	SB204990 vs SB204990+Malonyl-CoA 100
	p value	0.0001	0.0006	< 0.0001	< 0.0001
