# Supplementary material for: ACLY ubiquitination by CUL3-KLHL25 induces the reprogramming of fatty acid metabolism to facilitate iTreg differentiation
Source: eLife journal article supplement (doi:10.7554/elife.62394), 2021-09-06
Supplement: data1 [file Figure 2D-Source data.xlsx]

## Sheet: Sheet1
Figure 2D-Source data.
		Ctrl	SB204990	SB204990 +Malonyl-CoA	SB204990 +Cerulenin
	Rep 1	0.935644	1.35693	0.841584	0.992574
	Rep 2	1.0198	1.54208	1.17376	1.03663
	Rep 3	1.04455	1.37822	0.792079	0.823762
	Average	1	1.42574	0.935808	0.95099
	SD	0.05709	0.1013	0.2076	0.1124
		Ctrl vs SB204990	SB204990 vs SB204990+Malonyl-CoA	SB204990 vs SB204990+Cerulenin	Ctrl vs SB204990+Malonyl-CoA	Ctrl vs SB204990+Cerulenin
	p value	0.0042	0.0018	0.0022	0.5666	0.6603
