# Supplementary material for: ACLY ubiquitination by CUL3-KLHL25 induces the reprogramming of fatty acid metabolism to facilitate iTreg differentiation
Source: eLife journal article supplement (doi:10.7554/elife.62394), 2021-09-06
Supplement: data1 [file Figure 2E-Source data.xlsx]

## Sheet: Sheet1
Figure 2E-Source data.
		Ctrl			SB204990			SB204990 +Malonyl-CoA			SB204990 +Cerulenin
	Time (minutes)	Rep 1	Rep 2	Rep 3	Rep 1	Rep 2	Rep 3	Rep 1	Rep 2	Rep 3	Rep 1	Rep 2	Rep 3
	1.59074	100.678	92.0951	93.6348	131.195	100.377	109.083	106.503	90.6473	87.2354	91.1223	88.7678	81.9705
	8.19445	94.6911	85.482	90.2072	121.16	94.6295	107.139	99.5908	84.4854	83.6298	82.8276	81.6396	79.6662
	14.8023	93.3214	83.3163	89.542	118.237	92.1643	107.149	97.8876	82.362	82.5511	80.7863	78.2895	79.6453
	21.493	22.4553	20.9316	16.2858	27.5509	21.5264	14.8841	21.6747	18.9812	19.3927	20.4659	19.3914	13.8569
	28.1026	23.8332	21.1986	22.1497	30.0987	22.4906	13.591	23.4789	19.6467	18.8029	21.748	20.359	14.6584
	34.6741	23.8038	21.5014	21.638	29.5432	22.0945	15.1102	23.8084	20.8142	18.9294	21.5209	19.8677	16.5006
	41.3637	183.047	172.216	150.293	221.518	216.477	204.928	189.535	172.643	150.853	164.837	156.488	157.47
	47.9929	181.816	169.161	160.793	211.13	221.108	200.696	185.241	171.944	154.833	161.99	154.976	163.208
	54.6137	168.166	152.655	166.89	190.32	220.233	195.473	165.1	160.278	155.966	142.569	141.172	162.855
	61.3153	41.1969	32.6651	23.4701	42.0802	29.6602	17.3819	35.4459	28.008	20.6927	26.8639	29.7435	17.3461
	67.9409	39.4114	33.614	26.4125	44.5578	32.5472	19.4872	41.3372	33.7817	16.8104	30.0045	27.0363	21.4994
	74.565	39.1286	32.3836	22.2695	46.1029	33.08	20.8866	41.3196	32.3161	17.3502	30.8492	26.8941	22.5246
		Max PA-OCR
				Ctrl	SB204990	SB204990 +Malonyl-CoA	SB204990 +Cerulenin
			Rep 1	143.918	179.438	137.973	154.089
			Rep 2	139.833	191.448	129.594	144.635
			Rep 3	144.62	187.546	139.155	145.861
			Average	142.79	186.144	135.574	148.195
			SD	2.586	6.127	5.213	5.141
				Ctrl vs SB204990	SB204990 vs SB204990+Malonyl-CoA	SB204990 vs SB204990+Cerulenin
			p value	< 0.0001	< 0.0001	< 0.0001
