# Supplementary material for: ACLY ubiquitination by CUL3-KLHL25 induces the reprogramming of fatty acid metabolism to facilitate iTreg differentiation
Source: eLife journal article supplement (doi:10.7554/elife.62394), 2021-09-06
Supplement: data1 [file Figure 2F-Source data.xlsx]

## Sheet: Sheet1
Figure 2F-Source data.
		Ctrl	SB204990	SB204990+siCpt1
	Rep 1	25.6	33	23.2
	Rep 2	20	31.3	18.1
	Rep 3	22.5	30	20
	Average	22.7	31.4333	20.4333
	SD	2.805	1.504	2.577
		Ctrl vs SB204990	SB204990 vs SB204990+siCpt1	Ctrl vs SB204990+siCpt1
	p value	0.004	0.0013	0.2849
