# Supplementary material for: ACLY ubiquitination by CUL3-KLHL25 induces the reprogramming of fatty acid metabolism to facilitate iTreg differentiation
Source: eLife journal article supplement (doi:10.7554/elife.62394), 2021-09-06
Supplement: data1 [file Figure 3-figure supplement 1A-Source data-2.xlsx]

## Sheet: Sheet1
Figure 3-figure supplement 1A-Source data-2.
		Th0	iTreg
	Rep 1	0.981047	0.895739
	Rep 2	1.03792	1.0237
	Rep 3	0.981047	0.881521
	Average	1	0.933654
	SD	0.03284	0.07831
	p value		0.2474
