# Supplementary material for: ACLY ubiquitination by CUL3-KLHL25 induces the reprogramming of fatty acid metabolism to facilitate iTreg differentiation
Source: eLife journal article supplement (doi:10.7554/elife.62394), 2021-09-06
Supplement: data1 [file Figure 3-figure supplement 1B-Source data-3.xlsx]

## Sheet: Sheet1
Figure 3-figure supplement 1B-Source data-3.
		Ctrl	TGFβ1
	Rep 1	1.022	1.03822
	Rep 2	1.06852	1.08348
	Rep 3	0.909477	0.992954
	Average	1	1.03822
	SD	0.08177	0.04526
	p value		0.5179
