# Supplementary material for: ACLY ubiquitination by CUL3-KLHL25 induces the reprogramming of fatty acid metabolism to facilitate iTreg differentiation
Source: eLife journal article supplement (doi:10.7554/elife.62394), 2021-09-06
Supplement: data1 [file Figure 3-figure supplement 1C-Source data.xlsx]

## Sheet: Sheet1
Figure 3-figure supplement 1C-Source data.
		Th0	iTreg
	Rep 1	1.03929	0.998021
	Rep 2	1.11685	0.940736
	Rep 3	0.843865	0.645777
	Average	1	0.861511
	SD	0.1407	0.189
	p value		0.3662
