# Supplementary material for: ACLY ubiquitination by CUL3-KLHL25 induces the reprogramming of fatty acid metabolism to facilitate iTreg differentiation
Source: eLife journal article supplement (doi:10.7554/elife.62394), 2021-09-06
Supplement: data1 [file Figure 3-figure supplement 2B-Source data-3.xlsx]

## Sheet: Sheet1
Figure 3-figure supplement 2B-Source data-3.
		ACLYWT +CHX 0	ACLYWT +CHX 2	ACLYWT +CHX 4	ACLYWT +CHX 8	ACLY3KR +CHX 0	ACLY3KR +CHX 2	ACLY3KR +CHX 4	ACLY3KR +CHX 8
	Rep 1	0.87958	0.860751	0.675659	0.450034	1.24074	1.11421	1.09238	1.08795
	Rep 2	1.10042	1.06159	0.796163	0.570538	1.44158	1.51589	1.49406	1.48879
	Rep 3	1.02	0.961171	0.595324	0.409866	1.32107	1.31505	1.1928	1.18753
	Average	1	0.961171	0.689049	0.476813	1.33446	1.31505	1.25975	1.25475
	SD	0.1118	0.1004	0.1011	0.08362	0.1011	0.2008	0.209	0.2087
		ACLYWT +CHX 0 vs ACLYWT +CHX 2	ACLYWT +CHX 0 vs ACLYWT +CHX 4	ACLYWT +CHX 0 vs ACLYWT +CHX 8	ACLY3KR +CHX 0 vs ACLY3KR +CHX 2	ACLY3KR +CHX 0 vs ACLY3KR +CHX 4	ACLY3KR +CHX 0 vs ACLY3KR +CHX 8
	p value	0.7537	0.0211	0.0005	0.8752	0.5477	0.5216
