# Supplementary material for: ACLY ubiquitination by CUL3-KLHL25 induces the reprogramming of fatty acid metabolism to facilitate iTreg differentiation
Source: eLife journal article supplement (doi:10.7554/elife.62394), 2021-09-06
Supplement: data1 [file Figure 3A-Source data-3.xlsx]

## Sheet: Sheet1
Figure 3A-Source data-3.
		Th0	iTreg
	Rep 1	0.8806	0.6239
	Rep 2	1.1907	0.442
	Rep 3	0.9287	0.6205
	Average	1	0.562133
	SD	0.1669	0.1041
	p value		0.0182
