# Supplementary material for: ACLY ubiquitination by CUL3-KLHL25 induces the reprogramming of fatty acid metabolism to facilitate iTreg differentiation
Source: eLife journal article supplement (doi:10.7554/elife.62394), 2021-09-06
Supplement: data1 [file Figure 3B-Source data-3.xlsx]

## Sheet: Sheet1
Figure 3B-Source data-3.
			Ctrl				TGFβ1
			CHX (0 h)	CHX (2 h)	CHX (4 h)	CHX (8 h)	CHX (0 h)	CHX (2 h)	CHX (4 h)	CHX (8 h)
		Rep 1	100	99.7543	72.8504	45.6286	100	81.0008	56.5642	26.3137
		Rep 2	100	99.9744	75.2301	44.9337	100	73.7718	42.3022	27.0606
		Rep 3	100	98.7319	74.7101	55.1268	100	82.4842	49.8762	30.535
		Average	100	99.4869	74.2635	48.5631	100	79.0856	49.5809	27.9698
		SD	0	0.663045	1.25109	5.69499	0	4.66126	7.13559	2.25273
			Ctrl vs TGFβ1
		p value (8 h)	< 0.0001
