# Supplementary material for: ACLY ubiquitination by CUL3-KLHL25 induces the reprogramming of fatty acid metabolism to facilitate iTreg differentiation
Source: eLife journal article supplement (doi:10.7554/elife.62394), 2021-09-06
Supplement: data1 [file Figure 3C-Source data-3.xlsx]

## Sheet: Sheet1
Figure 3C-Source data-3.
		Ctrl	TGFβ1	TGFβ1 +MG132 10	TGFβ1 +MG132 20	TGFβ1 +MG132 40
	Rep 1	1.00219	0.606038	0.857269	0.868273	0.934064
	Rep 2	1.19222	0.701053	1.13281	1.0583	1.02908
	Rep 3	0.805583	0.511024	0.762255	0.80256	0.744036
	Average	1	0.606038	0.917445	0.909711	0.902393
	SD	0.1933	0.09501	0.1925	0.1328	0.1451
		Ctrl vs TGFβ1	TGFβ1 vs TGFβ1 +MG132 10	TGFβ1 vs TGFβ1 +MG132 20	TGFβ1 vs TGFβ1 +MG132 40
	p value	0.0115	0.0348	0.0386	0.0426
