# Supplementary material for: ACLY ubiquitination by CUL3-KLHL25 induces the reprogramming of fatty acid metabolism to facilitate iTreg differentiation
Source: eLife journal article supplement (doi:10.7554/elife.62394), 2021-09-06
Supplement: data1 [file Figure 3C-Source data-6.xlsx]

## Sheet: Sheet1
Figure 3C-Source data-6.
		Ctrl	TGFβ1	TGFβ1 +Leupeptin 0.4	TGFβ1 +Leupeptin 0.8
	Rep 1	0.936666	0.637933	0.601017	0.55782
	Rep 2	1.22167	0.827935	0.79102	0.747823
	Rep 3	0.841665	0.542932	0.506016	0.55782
	Average	1	0.6696	0.632684	0.621154
	SD	0.1978	0.1451	0.1451	0.1097
		Ctrl vs TGFβ1	TGFβ1 vs TGFβ1 +Leupeptin 0.4	TGFβ1 vs TGFβ1 +Leupeptin 0.8
	p value	0.0293	0.7747	0.7077
