# Supplementary material for: ACLY ubiquitination by CUL3-KLHL25 induces the reprogramming of fatty acid metabolism to facilitate iTreg differentiation
Source: eLife journal article supplement (doi:10.7554/elife.62394), 2021-09-06
Supplement: data1 [file Figure 3G-Source data-3.xlsx]

## Sheet: Sheet1
Figure 3G-Source data-3.
		ACLYWT	ACLYWT +TGFβ1	ACLY3KR	ACLY3KR +TGFβ1
	Rep 1	0.846647	0.473839	1.11948	1.2
	Rep 2	1.15335	0.780545	1.31819	1.28615
	Rep 3	0.999999	0.565851	1.26484	1.22481
	Average	0.999999	0.606745	1.23417	1.23699
	SD	0.1534	0.1574	0.1028	0.04435
	p value		0.0045		0.9784
