# Supplementary material for: ACLY ubiquitination by CUL3-KLHL25 induces the reprogramming of fatty acid metabolism to facilitate iTreg differentiation
Source: eLife journal article supplement (doi:10.7554/elife.62394), 2021-09-06
Supplement: data1 [file Figure 3H-Source data.xlsx]

## Sheet: Sheet1
Figure 3H-Source data.
		ACLYWT	ACLYWT +TGFβ1	ACLY3KR	ACLY3KR +TGFβ1
	Rep 1	0.94133	1.31763	0.80334	1.03024
	Rep 2	0.85634	1.24647	0.77733	1.07373
	Rep 3	1.20233	1.53874	0.96352	1.14502
	Average	1	1.36761	0.848063	1.083
	SD	0.1803	0.1524	0.1008	0.05795
	p value		0.0091		0.0602
