# Supplementary material for: ACLY ubiquitination by CUL3-KLHL25 induces the reprogramming of fatty acid metabolism to facilitate iTreg differentiation
Source: eLife journal article supplement (doi:10.7554/elife.62394), 2021-09-06
Supplement: data1 [file Figure 3I-Source data.xlsx]

## Sheet: Sheet1
Figure 3I-Source data.
		ACLYWT	ACLYWT +TGFβ1	ACLY3KR	ACLY3KR +TGFβ1
	Rep 1	4.12	20.2	2.95	14.3
	Rep 2	6.78	20.5	4.43	10
	Rep 3	4.13	19	3.26	13
	Average	5.01	19.9	3.54667	12.4333
	SD	1.533	0.7937	0.7805	2.205
		ACLYWT +TGFβ1 vs ACLY3KR +TGFβ1
	p value	0.0002
