# Supplementary material for: ACLY ubiquitination by CUL3-KLHL25 induces the reprogramming of fatty acid metabolism to facilitate iTreg differentiation
Source: eLife journal article supplement (doi:10.7554/elife.62394), 2021-09-06
Supplement: data1 [file Figure 4-figure supplement 2A-Source data-3.xlsx]

## Sheet: Sheet1
Figure 4-figure supplement 2A-Source data-3.
		siCtrl	siKlhl25#1	siKlhl25#2	siKlhl25#3	siKlhl25#Mix
	Rep 1	0.955664	0.861951	0.367307	0.621124	0.351133
	Rep 2	1.22169	1.07477	0.373716	0.580738	0.284145
	Rep 3	0.822653	0.808747	0.307694	0.488113	0.30152
	Average	1	0.915156	0.349572	0.563325	0.312266
	SD	0.2032	0.1408	0.03641	0.06819	0.03476
		siCtrl vs siKlhl25#1	siCtrl vs siKlhl25#2	siCtrl vs siKlhl25#3	siCtrl vs siKlhl25#Mix
	p value	0.3948	< 0.0001	0.001	< 0.0001
