# Supplementary material for: ACLY ubiquitination by CUL3-KLHL25 induces the reprogramming of fatty acid metabolism to facilitate iTreg differentiation
Source: eLife journal article supplement (doi:10.7554/elife.62394), 2021-09-06
Supplement: data1 [file Figure 4-figure supplement 2B-Source data-3.xlsx]

## Sheet: Sheet1
Figure 4-figure supplement 2B-Source data-3.
		siCtrl +CHX 0	siCtrl +CHX 2	siCtrl +CHX 4	siCtrl +CHX 8	siCul3 +CHX 0	siCul3 +CHX 2	siCul3 +CHX 4	siCul3 +CHX 8	siKlhl25#2 +CHX 0	siKlhl25#2 +CHX 2	siKlhl25#2 +CHX 4	siKlhl25#2 +CHX 8
	Rep 1	0.810811	0.632741	0.454565	0.155867	1.03241	0.960063	0.917586	0.8	1.09421	0.971177	1.01393	0.824625
	Rep 2	1.21622	0.949112	0.681848	0.2338	1.54862	1.44009	1.37638	1.2	1.64131	1.45677	1.5209	1.23694
	Rep 3	0.972974	0.759289	0.545478	0.18704	1.2389	1.15208	1.1011	1.021	1.31305	1.16541	1.21672	0.989551
	Average	1	0.780381	0.56063	0.192236	1.27331	1.18408	1.13169	1.007	1.34952	1.19779	1.25052	1.01704
	SD	0.204	0.1592	0.1144	0.03923	0.2598	0.2416	0.2309	0.2004	0.2754	0.2444	0.2552	0.2075
		siCtrl +CHX 0 vs siCtrl +CHX 2	siCtrl +CHX 0 vs siCtrl +CHX 4	siCtrl +CHX 0 vs siCtrl +CHX 8	siCul3 +CHX 0 vs siCul3 +CHX 2	siCul3 +CHX 0 vs siCul3 +CHX 4	siCul3 +CHX 0 vs siCul3 +CHX 8	siKlhl25#2 +CHX 0 vs siKlhl25#2 +CHX 2	siKlhl25#2 +CHX 0 vs siKlhl25#2 +CHX 4	siKlhl25#2 +CHX 0 vs siKlhl25#2 +CHX 8
	p value	0.2189	0.0186	0.0001	0.6127	0.4236	0.1389	0.3917	0.5745	0.068
