# Supplementary material for: ACLY ubiquitination by CUL3-KLHL25 induces the reprogramming of fatty acid metabolism to facilitate iTreg differentiation
Source: eLife journal article supplement (doi:10.7554/elife.62394), 2021-09-06
Supplement: data1 [file Figure 4-figure supplement 2C-Source data.xlsx]

## Sheet: Sheet1
Figure 4-figure supplement 2C-Source data.
		siCtrl	TGFβ+ siCtrl	TGFβ1+ siCul3	TGFβ1+ siCul3+siAcly#1
	Rep 1	1.06146	0.580913	0.69951	0.4463
	Rep 2	0.849892	0.517343	0.774824	0.391354
	Rep 3	1.08865	0.425849	0.697785	0.49024
	Average	1	0.508035	0.72404	0.442631
	SD	0.1307	0.07795	0.04399	0.04954
		siCtrl vs TGFβ1+ siCtrl	TGFβ1+siCtrl vs TGFβ1+ siCul3	TGFβ1+siCul3 vs TGFβ1+ siCul3+siAcly#1
	p value	< 0.0001	0.0128	0.0032
