# Supplementary material for: ACLY ubiquitination by CUL3-KLHL25 induces the reprogramming of fatty acid metabolism to facilitate iTreg differentiation
Source: eLife journal article supplement (doi:10.7554/elife.62394), 2021-09-06
Supplement: data1 [file Figure 4-figure supplement 3C-Source data.xlsx]

## Sheet: Sheet1
Figure 4-figure supplement 3C-Source data.
		WT	Cd4CreCul3fl/fl
	Rep 1	8.88	6.24
	Rep 2	10.9	0.74
	Rep 3	11.1	2.4
	Average	10.2933	3.12667
	SD	1.228	2.821
	p value		0.0157
