# Supplementary material for: ACLY ubiquitination by CUL3-KLHL25 induces the reprogramming of fatty acid metabolism to facilitate iTreg differentiation
Source: eLife journal article supplement (doi:10.7554/elife.62394), 2021-09-06
Supplement: data1 [file Figure 4-figure supplement 3D-Source data.xlsx]

## Sheet: Sheet1
Figure 4-figure supplement 3D-Source data.
		WT	WT+TGFβ1	Cul3-/-+TGFβ1	Cul3-/-+siAcly#1+TGFβ1
	Rep 1	1.03135	0.492257	0.889723	0.489817
	Rep 2	0.984233	0.459972	0.770249	0.478461
	Rep 3	0.98442	0.480056	0.829939	0.451807
	Average	1	0.477428	0.82997	0.473362
	SD	0.02715	0.0163	0.05974	0.01951
		WT vs WT+TGFβ1	WT+TGFβ1 vs Cul3-/-+TGFβ1	Cul3-/-+TGFβ1 vs Cul3-/-+siAcly#1+TGFβ1
	p value	< 0.0001	< 0.0001	< 0.0001
