# Supplementary material for: ACLY ubiquitination by CUL3-KLHL25 induces the reprogramming of fatty acid metabolism to facilitate iTreg differentiation
Source: eLife journal article supplement (doi:10.7554/elife.62394), 2021-09-06
Supplement: data1 [file Figure 4-figure supplement 4A-Source data-1.xlsx]

## Sheet: Sheet1
Figure 4-figure supplement 4A-Source data-1.
	CTLA4
		iTreg (WT)	iTreg (Cul3-/-)	iTreg (Cul3-/-+siAcly#1)
	Rep 1	460	359	365
	Rep 2	375	372	325
	Rep 3	421	405	396
	Average	418.667	378.667	362
	SD	42.55	23.71	35.59
		iTreg (WT) vs iTreg (Cul3-/-)	iTreg (WT) vs iTreg (Cul3-/-+siAcly#1)	iTreg (Cul3-/-) vs iTreg (Cul3-/-+siAcly#1)
	p value	0.2092	0.0934	0.5792
