# Supplementary material for: ACLY ubiquitination by CUL3-KLHL25 induces the reprogramming of fatty acid metabolism to facilitate iTreg differentiation
Source: eLife journal article supplement (doi:10.7554/elife.62394), 2021-09-06
Supplement: data1 [file Figure 4-figure supplement 4A-Source data-2.xlsx]

## Sheet: Sheet1
Figure 4-figure supplement 4A-Source data-2.
	ICOS
		iTreg (WT)	iTreg (Cul3-/-)	iTreg (Cul3-/-+siAcly#1)
	Rep 1	3568	3815	4461
	Rep 2	4295	4734	4095
	Rep 3	3822	4053	4238
	Average	3895	4200.67	4264.67
	SD	369	477	184.5
		iTreg (WT) vs iTreg (Cul3-/-)	iTreg (WT) vs iTreg (Cul3-/-+siAcly#1)	iTreg (Cul3-/-) vs iTreg (Cul3-/-+siAcly#1)
	p value	0.3435	0.26	0.8367
