# Supplementary material for: ACLY ubiquitination by CUL3-KLHL25 induces the reprogramming of fatty acid metabolism to facilitate iTreg differentiation
Source: eLife journal article supplement (doi:10.7554/elife.62394), 2021-09-06
Supplement: data1 [file Figure 4-figure supplement 4A-Source data-3.xlsx]

## Sheet: Sheet1
Figure 4-figure supplement 4A-Source data-3.
	TIGIT
		iTreg (WT)	iTreg (Cul3-/-)	iTreg (Cul3-/-+siAcly#1)
	Rep 1	328	318	337
	Rep 2	342	401	370
	Rep 3	403	394	380
	Average	357.667	371	362.333
	SD	39.88	46.03	22.5
		iTreg (WT) vs iTreg (Cul3-/-)	iTreg (WT) vs iTreg (Cul3-/-+siAcly#1)	iTreg (Cul3-/-) vs iTreg (Cul3-/-+siAcly#1)
	p value	0.6783	0.8838	0.7866
