# Supplementary material for: ACLY ubiquitination by CUL3-KLHL25 induces the reprogramming of fatty acid metabolism to facilitate iTreg differentiation
Source: eLife journal article supplement (doi:10.7554/elife.62394), 2021-09-06
Supplement: data1 [file Figure 4-figure supplement 4A-Source data-4.xlsx]

## Sheet: Sheet1
Figure 4-figure supplement 4A-Source data-4.
	IL-10
		iTreg (WT)	iTreg (Cul3-/-)	iTreg (Cul3-/-+siAcly#1)
	Rep 1	522	843	811
	Rep 2	754	512	562
	Rep 3	711	668	759
	Average	662.333	674.333	710.667
	SD	123.4	165.6	131.3
		iTreg (WT) vs iTreg (Cul3-/-)	iTreg (WT) vs iTreg (Cul3-/-+siAcly#1)	iTreg (Cul3-/-) vs iTreg (Cul3-/-+siAcly#1)
	p value	0.9206	0.6899	0.7635
