# Supplementary material for: ACLY ubiquitination by CUL3-KLHL25 induces the reprogramming of fatty acid metabolism to facilitate iTreg differentiation
Source: eLife journal article supplement (doi:10.7554/elife.62394), 2021-09-06
Supplement: data1 [file Figure 4-figure supplement 4B-Source data.xlsx]

## Sheet: Sheet1
Figure 4-figure supplement 4B-Source data.
		Th0	YFP-iTreg	YFP-iTreg (siCul3)	YFP-iTreg (siCul3+siAcly)
	Rep 1	42.6	15	16.8	13.1
	Rep 2	38.6	16	13	15
	Rep 3	40.3	17.6	16.8	18.2
	Average	40.5	16.2	15.5333	15.4333
	SD	2.007	1.311	2.194	2.577
		Th0 (WT) vs YFP-iTreg	Th0 vs YFP-iTreg (siCul3)	Th0 vs YFP-iTreg (siCul3+siAcly)	YFP-iTreg vs YFP-iTreg (siCul3)	YFP-iTreg vs YFP-iTreg (siCul3+siAcly)	YFP-iTreg (siCul3) vs YFP-iTreg (siCul3+siAcly)
	p value	< 0.0001	< 0.0001	< 0.0001	0.7041	0.6628	0.9544
