# Supplementary material for: ACLY ubiquitination by CUL3-KLHL25 induces the reprogramming of fatty acid metabolism to facilitate iTreg differentiation
Source: eLife journal article supplement (doi:10.7554/elife.62394), 2021-09-06
Supplement: data1 [file Figure 4C-Source data-5.xlsx]

## Sheet: Sheet1
Figure 4C-Source data-5.
		siCtrl	siCtrl+TGFβ1	siCul3	siCul3+TGFβ1	siKlhl25#2	siKlhl25#2+TGFβ1
	Rep 1	0.888029	0.412277	1.05984	1.01319	1.06834	1.17737
	Rep 2	0.962427	0.456097	1.17085	1.1147	1.1532	1.15495
	Rep 3	1.14954	0.57477	1.34113	1.34113	1.43272	1.22618
	Average	0.999999	0.481048	1.19061	1.15634	1.21809	1.18616
	SD	0.1347	0.08407	0.1417	0.1679	0.1907	0.03642
	p value		0.0005		0.7631		0.7788
