# Supplementary material for: ACLY ubiquitination by CUL3-KLHL25 induces the reprogramming of fatty acid metabolism to facilitate iTreg differentiation
Source: eLife journal article supplement (doi:10.7554/elife.62394), 2021-09-06
Supplement: data1 [file Figure 4D-Source data-4.xlsx]

## Sheet: Sheet1
Figure 4D-Source data-4.
		siCtrl	siCtrl +TGFβ1	siCul3 +TGFβ1	siCul3+siAcly#1 +TGFβ1
	Rep 1	0.870996	1.45166	0.967773	1.3581
	Rep 2	0.967773	1.64521	1.06777	1.45166
	Rep 3	1.16133	1.53555	1.25811	1.54199
	Average	1.00003	1.54414	1.09788	1.45059
	SD	0.1478	0.09706	0.1475	0.09195
		siCtrl vs siCtrl +TGFβ1	siCtrl +TGFβ1 vs siCul3 +TGFβ1	siCul3 +TGFβ1 vs siCul3+siAcly#1 +TGFβ1
	p value	0.0007	0.0023	0.0083
