# Supplementary material for: ACLY ubiquitination by CUL3-KLHL25 induces the reprogramming of fatty acid metabolism to facilitate iTreg differentiation
Source: eLife journal article supplement (doi:10.7554/elife.62394), 2021-09-06
Supplement: data1 [file Figure 4E-Source data.xlsx]

## Sheet: Sheet1
Figure 4E-Source data.
		siCtrl	siCtrl +TGFβ1	siCul3 +TGFβ1	siCul3+siAcly#1 +TGFβ1
	Rep 1	0.7	46.5	19.6	34.7
	Rep 2	1.5	40.6	16.4	31.7
	Rep 3	1	45.9	22.8	35.1
	Average	1.06667	44.3333	19.6	33.8333
	SD	0.4041	3.247	3.2	1.858
		siCtrl +TGFβ1 vs siCul3 +TGFβ1	siCul3 +TGFβ1 vs siCul3+siAcly#1 +TGFβ1
	p value	< 0.0001	0.0001
