# Supplementary material for: ACLY ubiquitination by CUL3-KLHL25 induces the reprogramming of fatty acid metabolism to facilitate iTreg differentiation
Source: eLife journal article supplement (doi:10.7554/elife.62394), 2021-09-06
Supplement: data1 [file Figure 4H-Source data-4.xlsx]

## Sheet: Sheet1
Figure 4H-Source data-4.
		WT	WT+TGFβ1	Cul3-/-	Cul3-/-+TGFβ1
	Rep 1	0.869658	0.315284	1.31865	1.44994
	Rep 2	0.913539	0.421533	1.40389	1.52352
	Rep 3	1.21681	0.695318	1.7383	1.59923
	Average	1	0.477378	1.48695	1.52423
	SD	0.189	0.1961	0.2218	0.07465
	p value		0.0073		0.8057
