# Supplementary material for: ACLY ubiquitination by CUL3-KLHL25 induces the reprogramming of fatty acid metabolism to facilitate iTreg differentiation
Source: eLife journal article supplement (doi:10.7554/elife.62394), 2021-09-06
Supplement: data1 [file Figure 4I-Source data-4.xlsx]

## Sheet: Sheet1
Figure 4I-Source data-4.
		WT	WT +TGFβ1	Cul3-/- +TGFβ1	Cul3-/-+siAcly#1 +TGFβ1
	Rep 1	0.770996	1.35166	0.927773	1.3581
	Rep 2	0.967773	1.44521	1.16777	1.50166
	Rep 3	1.26133	1.68555	1.25811	1.54199
	Average	1.00003	1.49414	1.11788	1.46725
	SD	0.2468	0.1722	0.1707	0.09665
		WT vs WT +TGFβ1	WT +TGFβ1 vs Cul3-/- +TGFβ1	Cul3-/- +TGFβ1 vs Cul3-/-+siAcly#1 +TGFβ1
	p value	0.0098	0.0334	0.0444
