# Supplementary material for: ACLY ubiquitination by CUL3-KLHL25 induces the reprogramming of fatty acid metabolism to facilitate iTreg differentiation
Source: eLife journal article supplement (doi:10.7554/elife.62394), 2021-09-06
Supplement: data1 [file Figure 4J-Source data.xlsx]

## Sheet: Sheet1
Figure 4J-Source data.
		WT	WT +TGFβ1	Cul3-/- +TGFβ1	Cul3-/-+siAcly#1 +TGFβ1
	Rep 1	2.81	42.6	19	40.6
	Rep 2	1.9	46	23.3	45.1
	Rep 3	1.2	48.9	16.5	36.3
	Average	1.97	45.8333	19.6	40.6667
	SD	0.8073	3.153	3.439	4.4
		WT +TGFβ1 vs Cul3-/- +TGFβ1	Cul3-/- +TGFβ1 vs Cul3-/-+siAcly#1 +TGFβ1
	p value	< 0.0001	< 0.0001
