# Supplementary material for: ACLY ubiquitination by CUL3-KLHL25 induces the reprogramming of fatty acid metabolism to facilitate iTreg differentiation
Source: eLife journal article supplement (doi:10.7554/elife.62394), 2021-09-06
Supplement: data1 [file Figure 5A-Source data-3.xlsx]

## Sheet: Sheet1
Figure 5A-Source data-3.
		Ctrl	TGFβ1
	Rep 1	1.09469	0.668083
	Rep 2	0.889146	0.508084
	Rep 3	1.01617	0.698615
	Average	1	0.624927
	SD	0.1037	0.1023
	p value		0.0112
