# Supplementary material for: ACLY ubiquitination by CUL3-KLHL25 induces the reprogramming of fatty acid metabolism to facilitate iTreg differentiation
Source: eLife journal article supplement (doi:10.7554/elife.62394), 2021-09-06
Supplement: data1 [file Figure 5B-Source data.xlsx]

## Sheet: Sheet1
Figure 5B-Source data.
		Ctrl	TGFβ1	ACLYOE+TGFβ1
	Rep 1	2.4	34.5	19.9
	Rep 2	2.3	30	18
	Rep 3	1.6	38.6	23.5
	Average	2.1	34.3667	20.4667
	SD	0.4359	4.302	2.793
		TGFβ1 vs ACLYOE+TGFβ1
	p value	0.0012
