# Supplementary material for: ACLY ubiquitination by CUL3-KLHL25 induces the reprogramming of fatty acid metabolism to facilitate iTreg differentiation
Source: eLife journal article supplement (doi:10.7554/elife.62394), 2021-09-06
Supplement: data1 [file Figure 5C-Source data.xlsx]

## Sheet: Sheet1
Figure 5C-Source data.
		C	SB
	Rep 1	17.9	38.8
	Rep 2	15.5	28
	Rep 3	22.2	31.7
	Average	18.5333	32.8333
	SD	3.395	5.488
	p value		0.0185
