# Supplementary material for: ACLY ubiquitination by CUL3-KLHL25 induces the reprogramming of fatty acid metabolism to facilitate iTreg differentiation
Source: eLife journal article supplement (doi:10.7554/elife.62394), 2021-09-06
Supplement: data1 [file Figure 5F-Source data-3.xlsx]

## Sheet: Sheet1
Figure 5F-Source data-3.
		ACLYWT	ACLYWT+TGFβ1	ACLY3KR	ACLY3KR+TGFβ1
	Rep 1	0.880742	0.549907	1.12172	1.10059
	Rep 2	0.945999	0.585725	1.2397	1.17542
	Rep 3	1.22335	0.715622	1.6034	1.5251
	Average	1.0167	0.617085	1.32161	1.26703
	SD	0.1819	0.08719	0.2511	0.2266
	p value		0.0378		0.743
