# Supplementary material for: ACLY ubiquitination by CUL3-KLHL25 induces the reprogramming of fatty acid metabolism to facilitate iTreg differentiation
Source: eLife journal article supplement (doi:10.7554/elife.62394), 2021-09-06
Supplement: data1 [file Figure 5G-Source data.xlsx]

## Sheet: Sheet1
Figure 5G-Source data.
		ACLYWT	ACLYWT +TGFβ1	ACLY3KR	ACLY3KR +TGFβ1
	Rep 1	1.46	21.6	1.14	12.6
	Rep 2	3.18	19.7	2.88	12
	Rep 3	3.26	22.1	1.96	16
	Average	2.63333	21.1333	1.99333	13.5333
	SD	1.017	1.266	0.8705	2.157
		ACLYWT +TGFβ1 vs ACLY3KR +TGFβ1
	p value	0.0002
