# Supplementary material for: ACLY ubiquitination by CUL3-KLHL25 induces the reprogramming of fatty acid metabolism to facilitate iTreg differentiation
Source: eLife journal article supplement (doi:10.7554/elife.62394), 2021-09-06
Supplement: data1 [file Figure 6-figure supplement 2A-Source data.xlsx]

## Sheet: Sheet1
Figure 6-figure supplement 2A-Source data.
		Ctrl	2% DSS	2% DSS +SB204990
	Rep 1	17.8	8.23	12.2
	Rep 2	16.2	9.7	14.8
	Rep 3	18.1	10.6	14
	Average	17.3667	9.51	13.6667
	SD	1.021	1.196	1.332
		Ctrl vs 2% DSS	2% DSS vs 2% DSS +SB204990
	p value	0.0002	0.0052
