# Supplementary material for: ACLY ubiquitination by CUL3-KLHL25 induces the reprogramming of fatty acid metabolism to facilitate iTreg differentiation
Source: eLife journal article supplement (doi:10.7554/elife.62394), 2021-09-06
Supplement: data1 [file Figure 6-figure supplement 2B-Source data.xlsx]

## Sheet: Sheet1
Figure 6-figure supplement 2B-Source data.
		Ctrl	2% DSS	2% DSS +SB204990
	Rep 1	11.5	5.95	7.69
	Rep 2	11	7.13	9.07
	Rep 3	10.7	6.75	8.42
	Average	11.0667	6.61	8.39333
	SD	0.4041	0.6023	0.6904
		Ctrl vs 2% DSS	2% DSS vs 2% DSS +SB204990
	p value	< 0.0001	0.0092
