# Supplementary material for: ACLY ubiquitination by CUL3-KLHL25 induces the reprogramming of fatty acid metabolism to facilitate iTreg differentiation
Source: eLife journal article supplement (doi:10.7554/elife.62394), 2021-09-06
Supplement: data1 [file Figure 6-figure supplement 2C-Source data.xlsx]

## Sheet: Sheet1
Figure 6-figure supplement 2C-Source data.
			Ctrl			2%DSS			2%DSS+SB204990
		Day	Mouse 1	Mouse 2	Mouse 3	Mouse 1	Mouse 2	Mouse 3	Mouse 1	Mouse 2	Mouse 3
		1	100	100	100	100	100	100	100	100	100
		2	100	100.56	100.54	102.23	103.49	100	100	98.97	96.28
		3	100.58	100.56	98.91	98.32	104.07	98.95	103.91	97.99	98.4
		4	102.31	97.19	102.17	95.53	100.58	98.95	98.32	97.94	100.53
		5	101.73	98.88	101.63	91.62	102.33	95.79	92.18	93.81	99.47
		6	102.89	101.12	102.72	91.62	94.77	93.16	90.5	91.75	96.28
		7	102.89	102.25	100.54	92.74	94.19	90.53	92.18	92.78	100
		8	104.05	101.69	100.54	88.27	93.02	88.42	91.62	92.78	98.4
		9	108.67	103.93	101.63	88.27	90.7	89.47	93.85	93.81	97.87
		10	109.25	105.62	103.26	87.15	82.56	86.84	93.85	95.88	98.4
			2%DSS vs 2%DSS+SB204990
			Day 8	Day 9	Day 10
		p value	0.0393	0.0079	< 0.0001
