# Supplementary material for: ACLY ubiquitination by CUL3-KLHL25 induces the reprogramming of fatty acid metabolism to facilitate iTreg differentiation
Source: eLife journal article supplement (doi:10.7554/elife.62394), 2021-09-06
Supplement: data1 [file Figure 6-figure supplement 2D-Source data.xlsx]

## Sheet: Sheet1
Figure 6-figure supplement 2D-Source data
			Ctrl			2%DSS			2%DSS+SB204990
		Day	Mouse 1	Mouse 2	Mouse 3	Mouse 1	Mouse 2	Mouse 3	Mouse 1	Mouse 2	Mouse 3
		2	1	1	1	1	1	1	1	1	2
		3	1	1	1	3	1	1	2	2	1
		4	1	2	1	4	3	2	2	3	2
		5	1	1	1	4	4	2	3	3	1
		6	1	1	1	6	6	6	3	5	2
		7	1	1	1	8	8	7	4	5	5
		8	0	1	0	10	9	7	5	6	4
		9	1	1	1	10	9	8	6	6	5
		10	1	1	1	10	9	10	7	5	6
			2%DSS vs 2%DSS+SB204990
			Day 6	Day 7	Day 8	Day 9	Day 10
		p value	< 0.0001	< 0.0001	< 0.0001	< 0.0001	< 0.0001
