# Supplementary material for: ACLY ubiquitination by CUL3-KLHL25 induces the reprogramming of fatty acid metabolism to facilitate iTreg differentiation
Source: eLife journal article supplement (doi:10.7554/elife.62394), 2021-09-06
Supplement: data1 [file Figure 6-figure supplement 2E-Source data.xlsx]

## Sheet: Sheet1
Figure 6-figure supplement 2E-Source data.
		Ctrl	2% DSS	2% DSS +SB204990
	Rep 1	54.35	39.91	43.18
	Rep 2	53.36	31.72	45.85
	Rep 3	60.57	38.14	46.8
	Average	56.0933	36.59	45.2767
	SD	3.908	4.309	1.877
		Ctrl vs 2% DSS	2% DSS vs 2% DSS +SB204990
	p value	0.0005	0.0236
