# Supplementary material for: ACLY ubiquitination by CUL3-KLHL25 induces the reprogramming of fatty acid metabolism to facilitate iTreg differentiation
Source: eLife journal article supplement (doi:10.7554/elife.62394), 2021-09-06
Supplement: data1 [file Figure 6-figure supplement 3B-Source data.xlsx]

## Sheet: Sheet1
Figure 6-figure supplement 3B-Source data.
		Th0	iTreg	iTreg (SB204990)
	Rep 1	90.2	70.3	50.7
	Rep 2	92	74.4	55.2
	Rep 3	87.3	62.5	45
	Average	89.8333	69.0667	50.3
	SD	2.371	6.045	5.112
		iTreg vs iTreg (SB204990)
	p value	0.0029
