# Supplementary material for: ACLY ubiquitination by CUL3-KLHL25 induces the reprogramming of fatty acid metabolism to facilitate iTreg differentiation
Source: eLife journal article supplement (doi:10.7554/elife.62394), 2021-09-06
Supplement: data1 [file Figure 6-figure supplement 3C-Source data-1.xlsx]

## Sheet: Sheet1
Figure 6-figure supplement 3C-Source data-1.
	Weight loss
			Ctrl				Colitis+Th0				Colitis+iTreg				Colitis+iTreg (SB204990)
		Week	Mouse 1	Mouse 2	Mouse 3	Mouse 4	Mouse 1	Mouse 2	Mouse 3	Mouse 4	Mouse 1	Mouse 2	Mouse 3	Mouse 4	Mouse 1	Mouse 2	Mouse 3	Mouse 4
		0	100	100	100	100	100	100	100	100	100	100	100	100	100	100	100	100
		1	100.81	99.55	97.73	99.41	95.64	99.84	100.1	100.9	100	99.73	102.89	100.05	98.76	101.68	99.51	100.82
		2	101.96	101.93	94.74	98.72	96.25	100.6	97.78	99.74	99.29	95.82	104.62	98.59	94.21	102.71	100.22	100.16
		3	102.61	102.61	95.67	98.86	96.7	100.33	97.31	95.14	98.04	94.59	103.75	96.56	94.26	102.22	98.7	99.45
		4	102.5	103.97	96.34	98.67	89.71	93.95	91.15	90.18	92.8	91.75	98.21	94.74	94.05	99.3	98.1	98.75
		5	103.15	107.43	103.1	99.85	88.81	85.4	87.53	84.53	91.77	90.95	94.29	89.64	92.81	98.59	97.4	97.55
		6	104.89	108.96	103.82	100.44	84.84	81.81	81.38	80.89	86.86	86.82	91.52	85.05	90.59	96.8	93.12	93.18
		7	104.18	109.75	110.47	107.86	78.41	81.86	78.12	77.3	82.61	84.47	86.96	79.01	89.87	89	92.57	92.91
			Colitis+Th0 vs Colitis+iTreg	Colitis+Th0 vs Colitis+iTreg (SB204990)	Colitis+iTreg vs Colitis+iTreg (SB204990)
		p value (Week 7)	0.0174	< 0.0001	< 0.0001
