# Supplementary material for: ACLY ubiquitination by CUL3-KLHL25 induces the reprogramming of fatty acid metabolism to facilitate iTreg differentiation
Source: eLife journal article supplement (doi:10.7554/elife.62394), 2021-09-06
Supplement: data1 [file Figure 6-figure supplement 3C-Source data-2.xlsx]

## Sheet: Sheet1
Figure 6-figure supplement 3C-Source data-2.
	DAI scores
			Ctrl				Colitis+Th0				Colitis+iTreg				Colitis+iTreg (SB204990)
		Week	Mouse 1	Mouse 2	Mouse 3	Mouse 4	Mouse 1	Mouse 2	Mouse 3	Mouse 4	Mouse 1	Mouse 2	Mouse 3	Mouse 4	Mouse 1	Mouse 2	Mouse 3	Mouse 4
		0	0	1	0	2	1	1	0	0	1	1	1	1	1	1	1	1
		1	0	1	0	2	2	1	1	2	1	0	2	1	1	1	1	1
		2	1	0	1	1	3	2	3	3	1	2	3	2	2	1	0	0
		3	0	1	1	0	4	4	5	5	2	4	3	3	3	1	1	1
		4	0	0	2	1	7	5	6	5	4	5	3	4	3	1	1	1
		5	1	0	1	1	7	7	8	9	4	4	5	5	4	2	3	3
		6	1	0	0	1	8	8	10	10	5	7	7	6	4	3	4	5
		7	0	1	2	1	9	9	10	10	7	7	7	8	5	6	5	5
			Colitis+Th0 vs Colitis+iTreg	Colitis+Th0 vs Colitis+iTreg (SB204990)	Colitis+iTreg vs Colitis+iTreg (SB204990)
		p value (Week 7)	< 0.0001	< 0.0001	0.0003
