# Supplementary material for: ACLY ubiquitination by CUL3-KLHL25 induces the reprogramming of fatty acid metabolism to facilitate iTreg differentiation
Source: eLife journal article supplement (doi:10.7554/elife.62394), 2021-09-06
Supplement: data1 [file Figure 6-figure supplement 3D-Source data.xlsx]

## Sheet: Sheet1
Figure 6-figure supplement 3D-Source data.
		Ctrl	Colitis	Colitis+ iTreg	Colitis+ iTreg (SB204990)
	Rep 1	55.36	39.27	45.98	48.28
	Rep 2	60.35	41.25	44.77	46.12
	Rep 3	54.38	40.38	43.26	47.2
	Rep 4	61.27	35.29	40.27	50.84
	Average	57.84	39.0475	43.57	48.11
	SD	3.473	2.633	2.465	2.022
		Ctrl vs Colitis	Colitis vs Colitis+ iTreg	Colitis+ iTreg vs Colitis+ iTreg (SB204990)
	p value	< 0.0001	0.0355	0.0349
