# Supplementary material for: ACLY ubiquitination by CUL3-KLHL25 induces the reprogramming of fatty acid metabolism to facilitate iTreg differentiation
Source: eLife journal article supplement (doi:10.7554/elife.62394), 2021-09-06
Supplement: data1 [file Figure 6-figure supplement 4C-Source data.xlsx]

## Sheet: Sheet1
Figure 6-figure supplement 4C-Source data.
		Challenge	Ctrl	Th0	iTreg	iTreg (siCul3)	iTreg (siCUL3+siAcly#1)
		0	0	0	0	0	0
		1	0	0	0	0	0
		2	0	0	0	0	0
		3	0	0	0	0	0
		4	0	0	0	0	0
		5	0	40	20	20	20
		6	0	60	20	40	20
		7	0	100	40	80	40
