# Supplementary material for: ACLY ubiquitination by CUL3-KLHL25 induces the reprogramming of fatty acid metabolism to facilitate iTreg differentiation
Source: eLife journal article supplement (doi:10.7554/elife.62394), 2021-09-06
Supplement: data1 [file Figure 6-figure supplement 4D-Source data.xlsx]

## Sheet: Sheet1
Figure 6-figure supplement 4D-Source data.
		Ctrl	Th0 (WT)	iTreg (WT)	iTreg (Cul3-/-)	iTreg (Cul3-/-+siAcly#1)
	Rep 1	26.0067	80.5566	45.7252	71.0985	57.1799
	Rep 2	24.2219	72.3594	45.3356	66.8529	37.4984
	Rep 3	20.2408	70.2367	53.5509	60.4495	47.3347
	Rep 4	19.9982	62.8173	44.8863	64.1668	42.2075
	Average	22.6169	71.4925	47.3745	65.642	46.0552
	SD	2.976	7.297	4.132	4.486	8.434
		Ctrl vs Th0 (WT)	Th0 (WT) vs iTreg (WT)	iTreg (WT) vs iTreg (Cul3-/-)	iTreg (Cul3-/-) vs iTreg (Cul3-/-+siAcly#1)
	p value	< 0.0001	< 0.0001	0.0005	0.0003
