# Supplementary material for: ACLY ubiquitination by CUL3-KLHL25 induces the reprogramming of fatty acid metabolism to facilitate iTreg differentiation
Source: eLife journal article supplement (doi:10.7554/elife.62394), 2021-09-06
Supplement: data1 [file Figure 6-figure supplement 4E-Source data.xlsx]

## Sheet: Sheet1
Figure 6-figure supplement 4E-Source data.
		Ctrl	Th0 (WT)	iTreg (WT)	iTreg (Cul3-/-)	iTreg (Cul3-/-+siAcly#1)
	Rep 1	212.326	936.184	457.717	909.655	548.486
	Rep 2	172.716	864.179	480.612	722.996	535.58
	Rep 3	213.178	789.374	401.728	819.607	434.553
	Rep 4	222.032	873.227	596.776	789.7	590.601
	Average	205.063	865.741	484.208	810.49	527.305
	SD	22.01	60.15	82.04	77.47	66.15
		Ctrl vs Th0 (WT)	Th0 (WT) vs iTreg (WT)	iTreg (WT) vs iTreg (Cul3-/-)	iTreg (Cul3-/-) vs iTreg (Cul3-/-+siAcly#1)
	p value	< 0.0001	< 0.0001	< 0.0001	< 0.0001
