# Supplementary material for: ACLY ubiquitination by CUL3-KLHL25 induces the reprogramming of fatty acid metabolism to facilitate iTreg differentiation
Source: eLife journal article supplement (doi:10.7554/elife.62394), 2021-09-06
Supplement: data1 [file Figure 6B-Source data.xlsx]

## Sheet: Sheet1
Figure 6B-Source data.
		Th0 (WT)	iTreg (WT)	iTreg (Cul3-/-)	iTreg (Cul3-/-+siAcly#1)
	Rep 1	97	63.4	90.1	67
	Rep 2	95.2	62.3	80	70.5
	Rep 3	93.1	70.3	83.6	72.1
	Average	95.1	65.3333	84.5667	69.8667
	SD	1.952	4.336	5.119	2.608
		Th0 (WT) vs iTreg (WT)	iTreg (WT) vs iTreg (Cul3-/-)	iTreg (Cul3-/-) vs iTreg (Cul3-/-+siAcly)
	p value	< 0.0001	0.0002	0.0013
