# Supplementary material for: ACLY ubiquitination by CUL3-KLHL25 induces the reprogramming of fatty acid metabolism to facilitate iTreg differentiation
Source: eLife journal article supplement (doi:10.7554/elife.62394), 2021-09-06
Supplement: data1 [file Figure 6C-Source data-1.xlsx]

## Sheet: Sheet1
Figure 6C-Source data-1.
	Weight loss
			Ctrl				Colitis+Th0 (WT)				Colitis+iTreg (WT)				Colitis+iTreg (Cul3-/-)				Colitis+iTreg (Cul3-/-+siAcly#1)
		Weeks	Mouse 1	Mouse 2	Mouse 3	Mouse 4	Mouse 1	Mouse 2	Mouse 3	Mouse 4	Mouse 1	Mouse 2	Mouse 3	Mouse 4	Mouse 1	Mouse 2	Mouse 3	Mouse 4	Mouse 1	Mouse 2	Mouse 3	Mouse 4
		0	100	100	100	100	100	100	100	100	100	100	100	100	100	100	100	100	100	100	100	100
		1	100.84	99.54	97.69	99.4	98.75	101.72	99.5	95.29	100	99.73	102.9	100.05	95.54	99.83	100.1	100.91	98.74	101.69	99.51	100.83
		2	102.01	101.97	94.65	98.69	94.16	102.77	100.22	102.94	99.28	95.77	104.65	98.58	96.16	100.61	97.76	99.73	94.13	102.73	100.22	100.17
		3	102.68	102.67	95.59	98.84	89.31	94.51	89.97	93.91	98.01	94.52	103.77	96.53	93.19	99.22	94.68	91.32	94.18	102.24	98.69	99.45
		4	102.57	104.06	96.27	98.64	84.14	90.95	87.53	83.77	99.34	92.25	99.36	94.69	89.47	93.84	91.08	90.03	92.4	98.74	93.73	98.73
		5	103.24	107.6	103.15	99.85	83.05	84.68	78.49	80.89	91.1	89.75	97.74	93.74	88.55	85.14	82.2	84.3	90.61	93.12	90.29	88.68
		6	105.03	109.17	103.88	100.45	75.38	82.19	76.44	77.06	89.44	89.37	97.27	88.07	84.49	81.48	75.99	80.6	85.21	89.68	87.62	87.58
		7	104.3	109.98	104.25	97.94	71.67	69.31	71.9	66.54	87.89	86.44	92.68	81.44	77.9	77.48	72.18	75.08	85.85	80.19	87.08	82.88
				Colitis+Th0 (WT) vs Colitis+iTreg (WT)	Colitis+iTreg (WT) vs Colitis+iTreg (Cul3-/-)	Colitis+iTreg (Cul3-/-) vs Colitis+iTreg (Cul3-/-+siAcly#1)
			p value (Weeks 7)	< 0.0001	< 0.0001	0.0001
