# Supplementary material for: ACLY ubiquitination by CUL3-KLHL25 induces the reprogramming of fatty acid metabolism to facilitate iTreg differentiation
Source: eLife journal article supplement (doi:10.7554/elife.62394), 2021-09-06
Supplement: data1 [file Figure 6C-Source data-2.xlsx]

## Sheet: Sheet1
Figure 6C-Source data-2.
	DAI scores
			Ctrl				Colitis+Th0 (WT)				Colitis+iTreg (WT)				Colitis+iTreg (Cul3-/-)				Colitis+iTreg (Cul3-/-+siAcly#1)
		Weeks	Mouse 1	Mouse 2	Mouse 3	Mouse 4	Mouse 1	Mouse 2	Mouse 3	Mouse 4	Mouse 1	Mouse 2	Mouse 3	Mouse 4	Mouse 1	Mouse 2	Mouse 3	Mouse 4	Mouse 1	Mouse 2	Mouse 3	Mouse 4
		0	0	0	0	1	1	1	1	0	1	1	1	1	1	1	1	1	1	0	1	1
		1	0	0	2	0	1	1	1	3	1	0	2	1	2	1	1	1	1	0	1	1
		2	1	1	1	1	4	1	3	3	1	2	3	3	2	2	2	1	4	3	2	2
		3	0	1	1	0	6	6	7	6	2	4	3	4	3	3	4	4	4	3	3	2
		4	0	0	1	1	8	6	7	7	4	5	3	4	5	5	5	5	4	3	6	2
		5	0	1	1	1	8	8	9	9	4	5	4	5	5	6	7	7	4	4	5	6
		6	1	0	0	1	8	8	10	10	5	6	5	5	8	7	8	7	5	6	6	5
		7	1	1	0	1	9	9	10	10	5	5	5	7	8	8	8	7	5	6	7	6
			Colitis+Th0 (WT) vs Colitis+iTreg (WT)	Colitis+iTreg (WT) vs Colitis+iTreg (Cul3-/-)	Colitis+iTreg (Cul3-/-) vs Colitis+iTreg (Cul3-/-+siAcly#1)
		p value (Weeks 7)	< 0.0001	< 0.0001	0.0013
