# Supplementary material for: ACLY ubiquitination by CUL3-KLHL25 induces the reprogramming of fatty acid metabolism to facilitate iTreg differentiation
Source: eLife journal article supplement (doi:10.7554/elife.62394), 2021-09-06
Supplement: data1 [file Figure 6D-Source data.xlsx]

## Sheet: Sheet1
Figure 6D-Source data.
		Ctrl	Th0 (WT)	iTreg (WT)	iTreg (Cul3-/-)	iTreg (Cul3-/-+siAcly#1)
	Rep 1	57.55	38.27	53.38	52.24	54.39
	Rep 2	61.23	40.12	55.63	51.29	55.17
	Rep 3	58.54	42.21	57.12	49.61	52.26
	Rep 4	62.28	45.37	50.45	48.38	56.86
	Average	59.9	41.4925	54.145	50.38	54.67
	SD	2.222	3.045	2.904	1.721	1.909
		Ctrl vs Th0 (WT)	Th0 (WT) vs iTreg (WT)	iTreg (WT) vs iTreg (Cul3-/-)	iTreg (Cul3-/-) vs iTreg (Cul3-/-+siAcly#1)
	p value	< 0.0001	< 0.0001	0.0438	0.0241
